# Supplementary material for: Discovery of (3-Benzyl-5-hydroxyphenyl)carbamates as New Antitubercular Agents with Potent In Vitro and In Vivo Efficacy
Source: PubMed Central journal article supplement (PMC6572244; doi:10.3390/molecules24102021), 2019-05-27

# Discovery of 3-hydroxyphenylcarbamates as new antitubercular agents with potent *in vitro* and *in vivo* efficacy

Ya-juan Cheng<sup>[a]#</sup>, Zhi-yong Liu<sup>[b]#</sup>, Hua-ju Liang<sup>[a]</sup>, Niu-niu Zhang<sup>[a]</sup>, Tian-yu Zhang<sup>[b, c]\*</sup>, Ming Yan<sup>[a]\*</sup>

# These two authors contribute equally to this study.

[a] School of Pharmaceutical Sciences, Sun Yat-sen University, Guangzhou 510006, China.

[b] State Key Laboratory of Respiratory Disease, Guangzhou Institutes of Biomedicine and Health, Chinese Academy of Science, Guangzhou 510530, China.

[c] University of Chinese Academy of Sciences (UCAS), Beijing 100049, China

\*Corresponding authors, e-mail: zhang\_tianyu@gibh.ac.cn (T. Y. Zhang); yanming@mail.sysu.edu.cn (M. Yan)

## Supporting Information

### 1. Copies of NMR spectra of products

Compound 1a

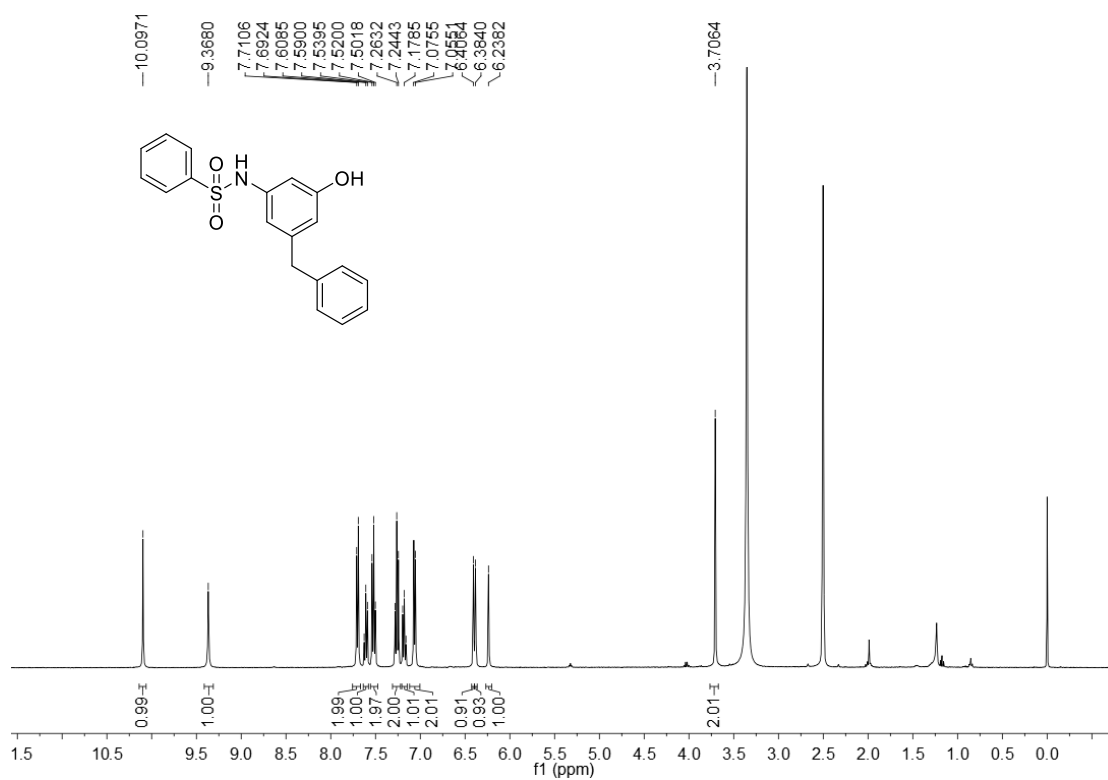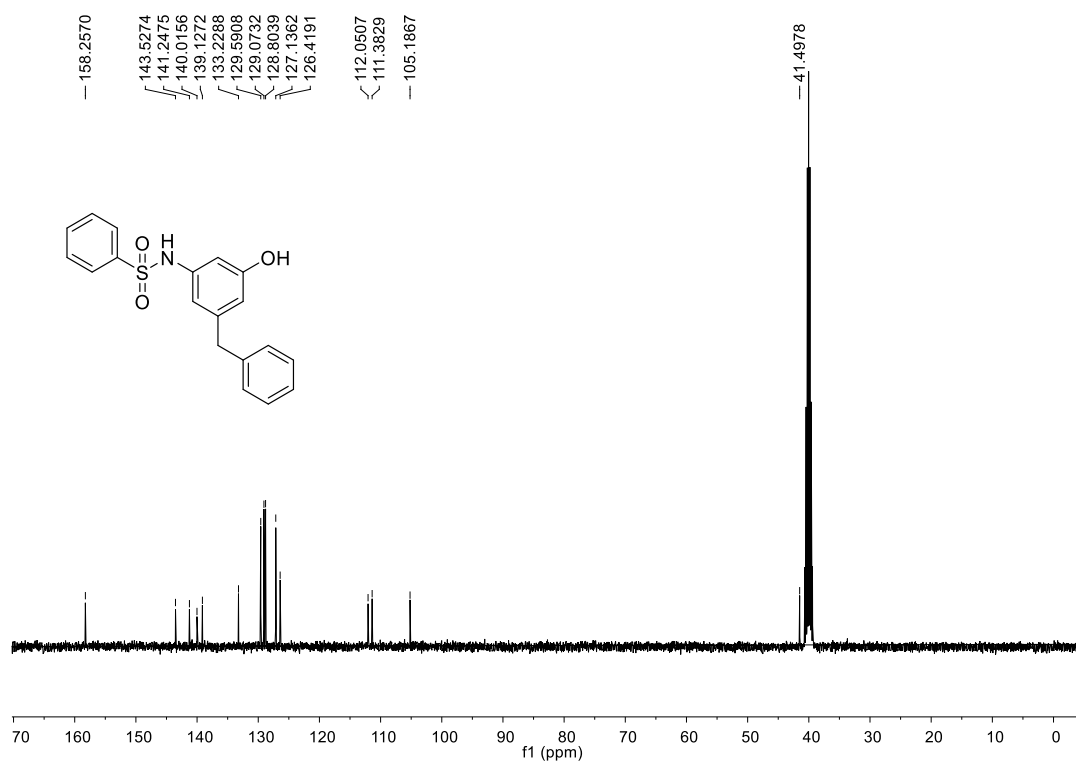

Compound 1b

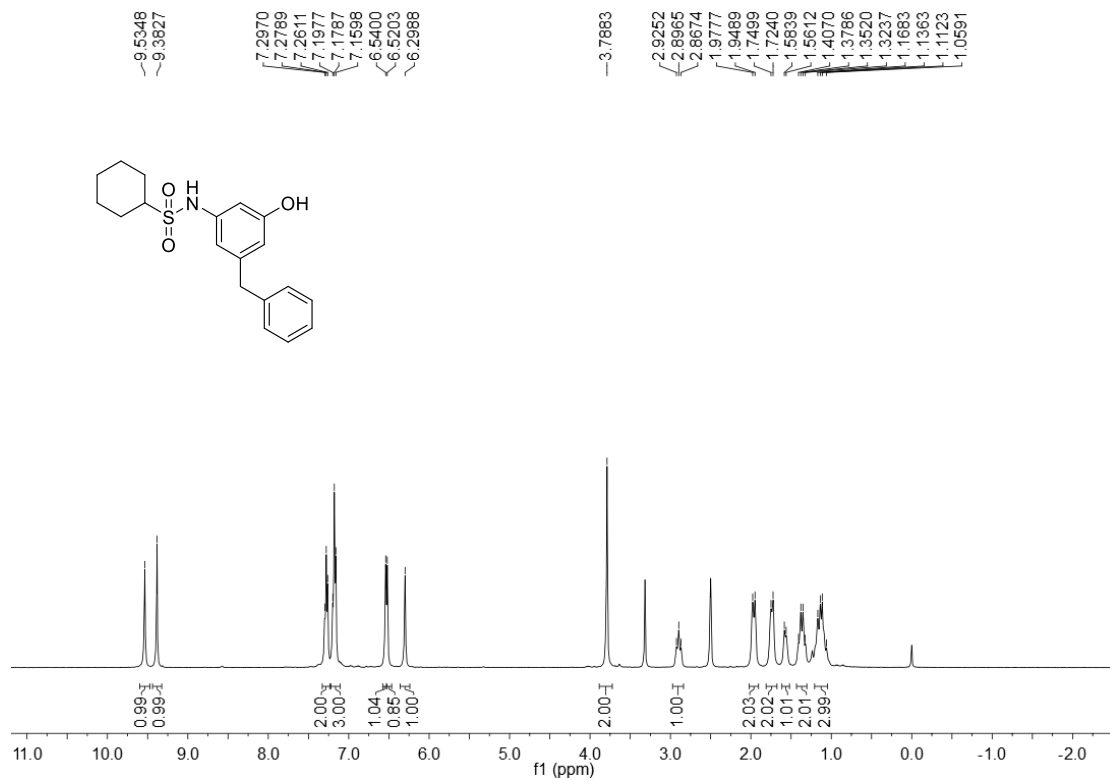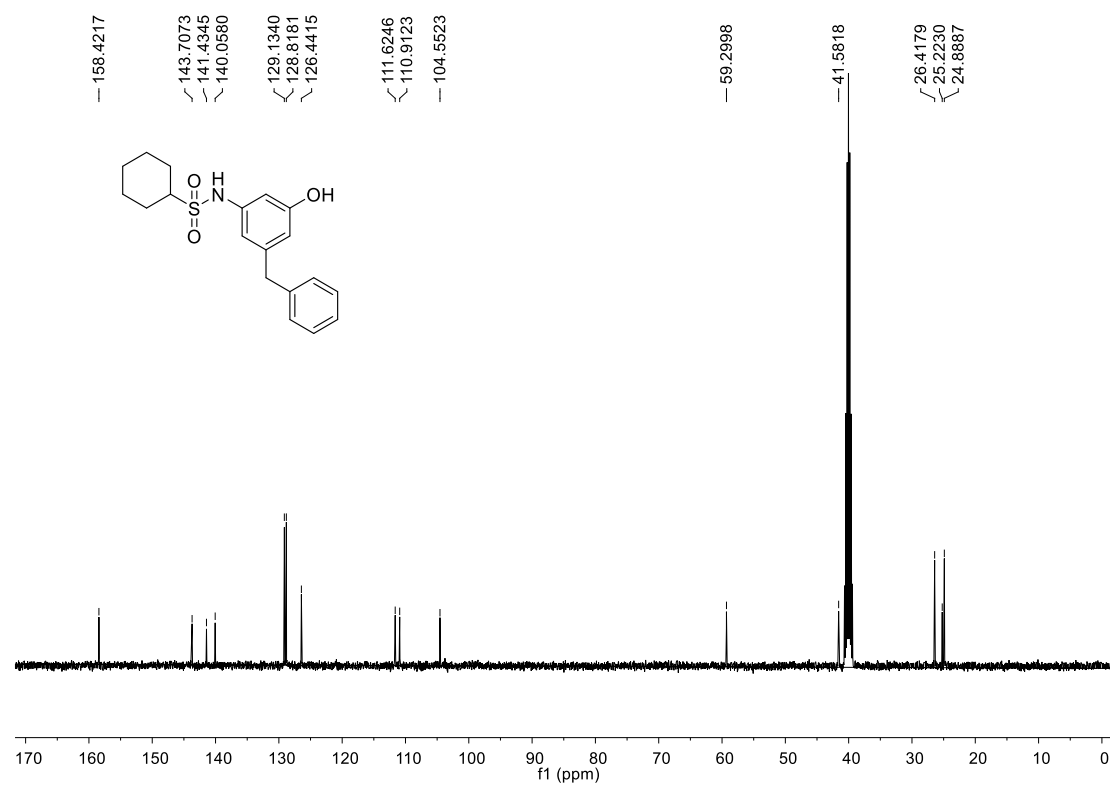

Compound 2a

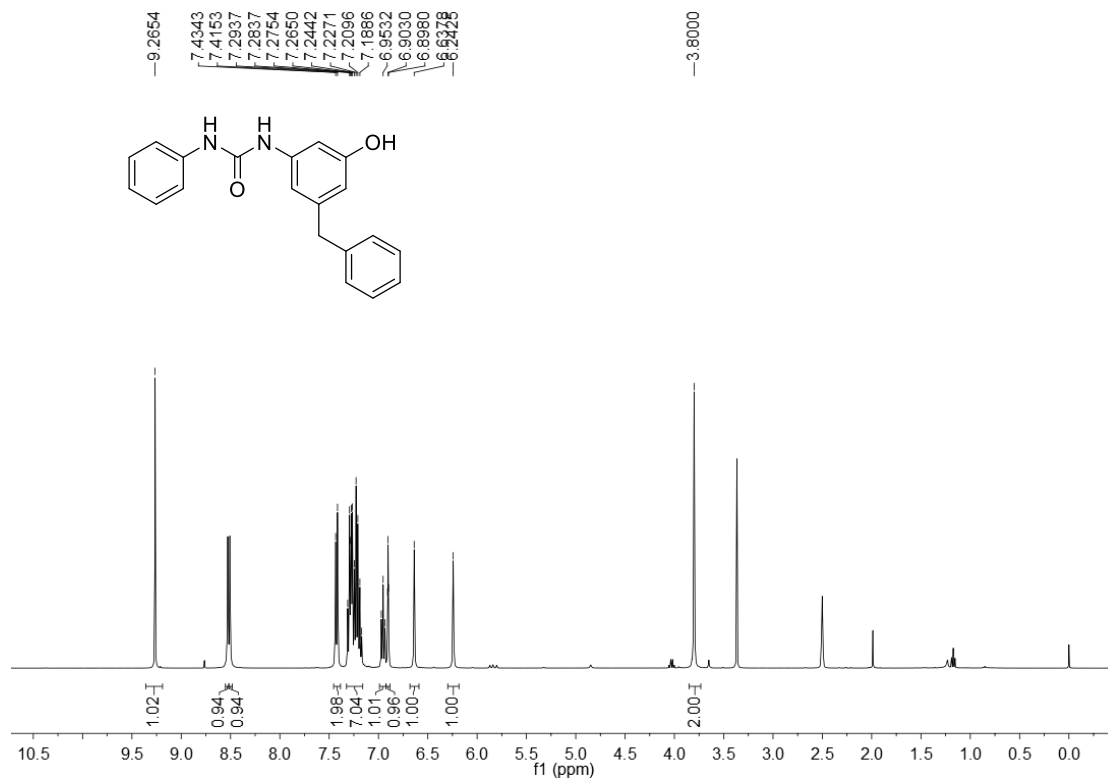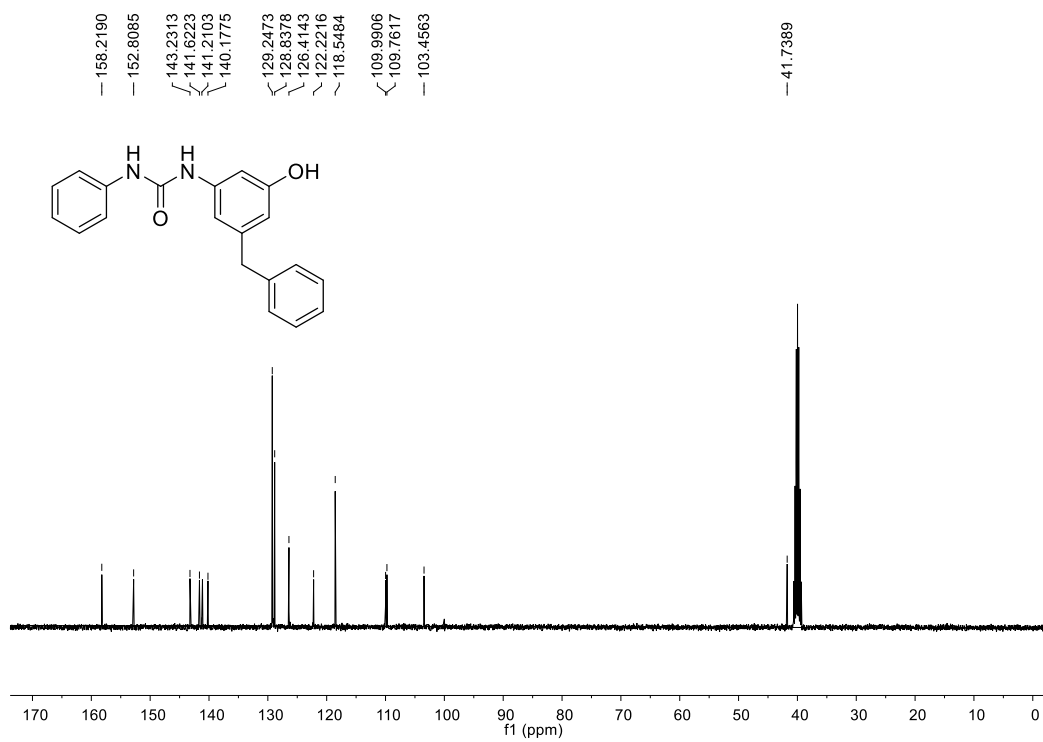

Compound 2b

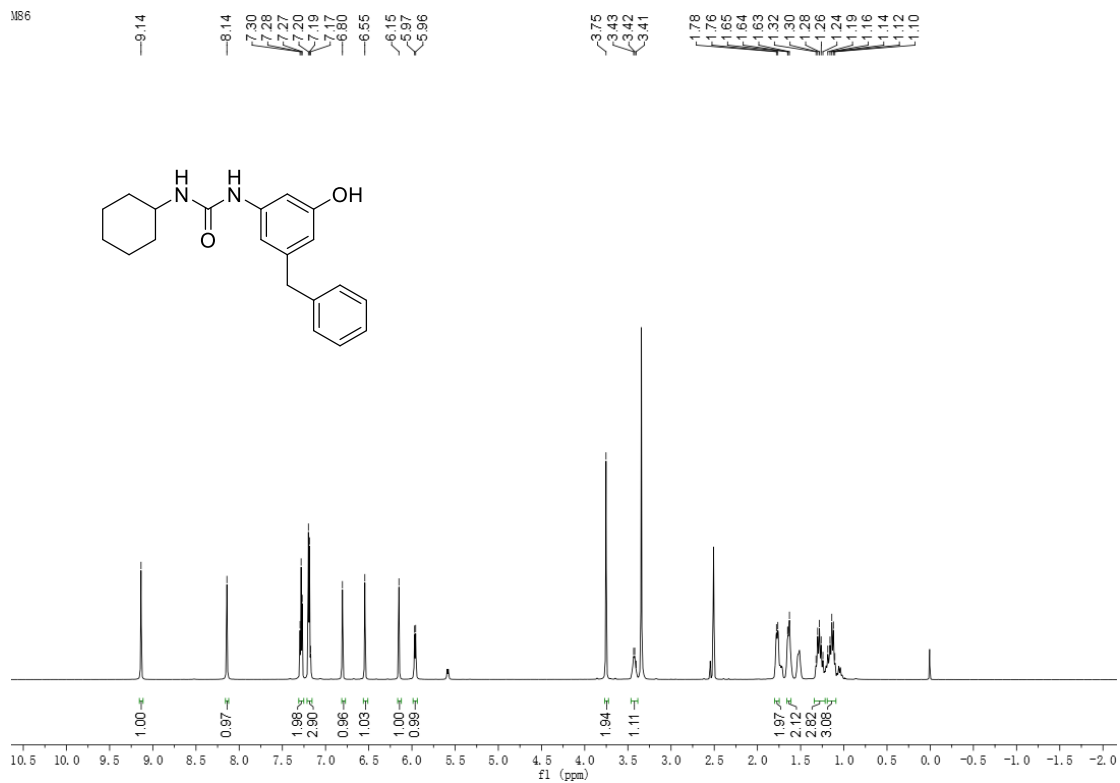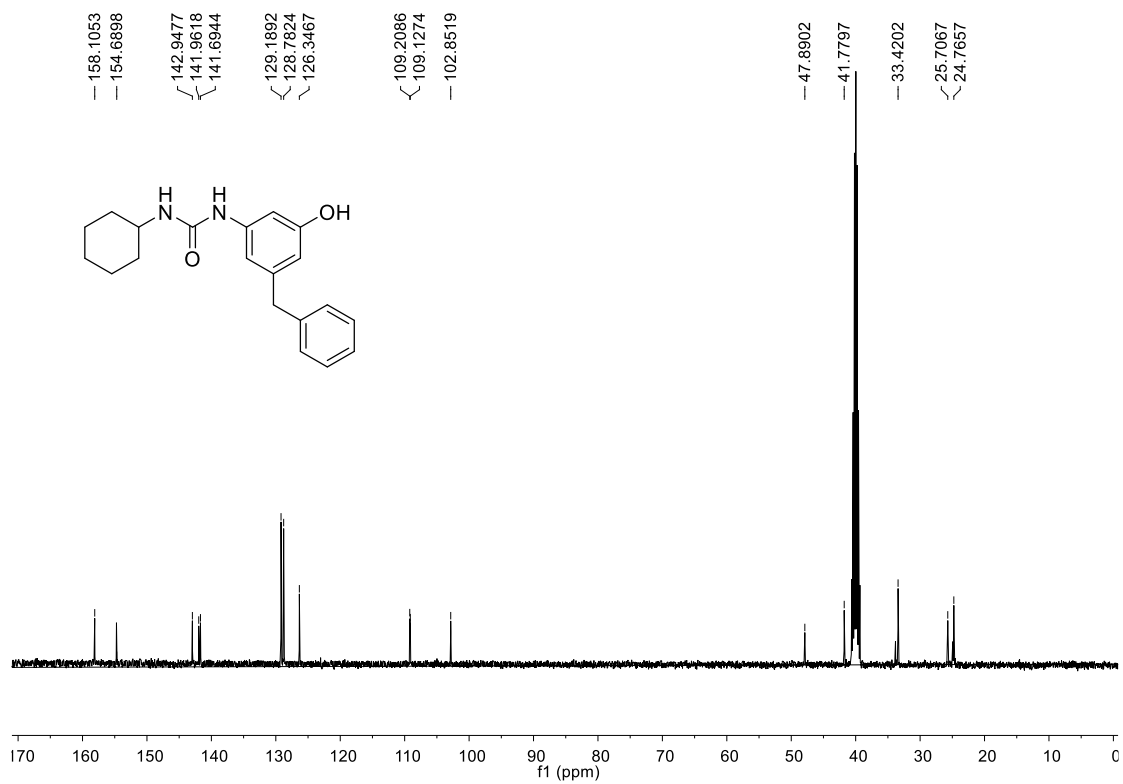

Compound 3a

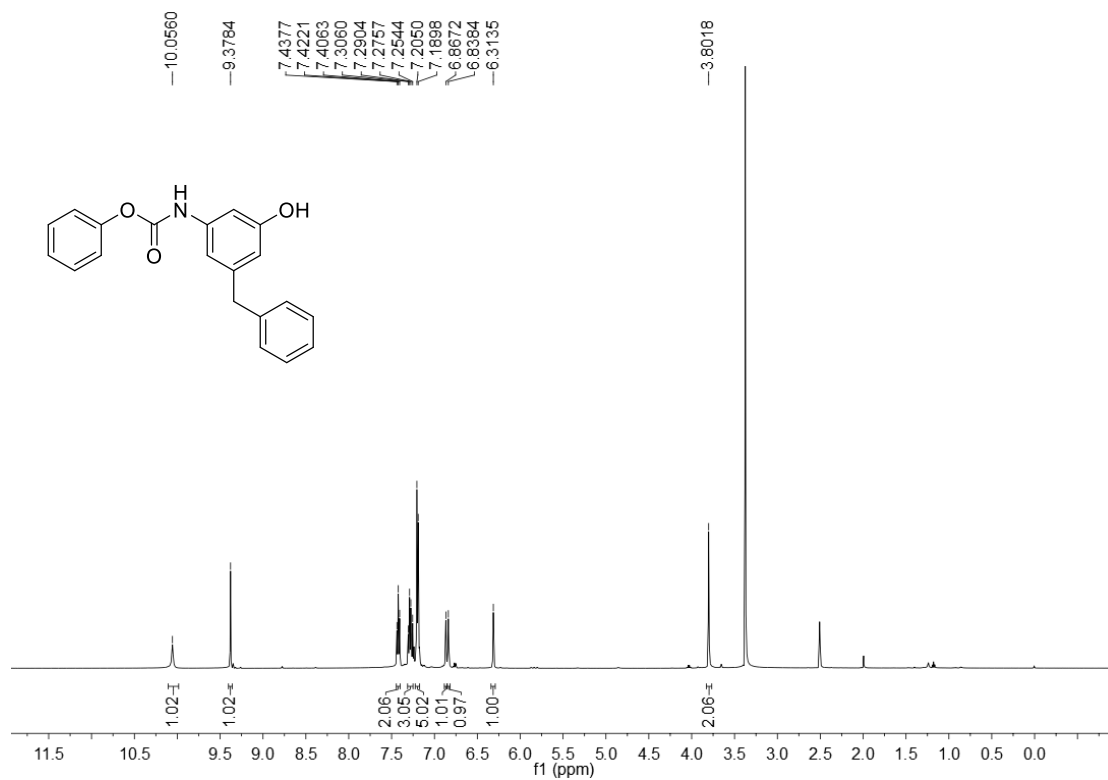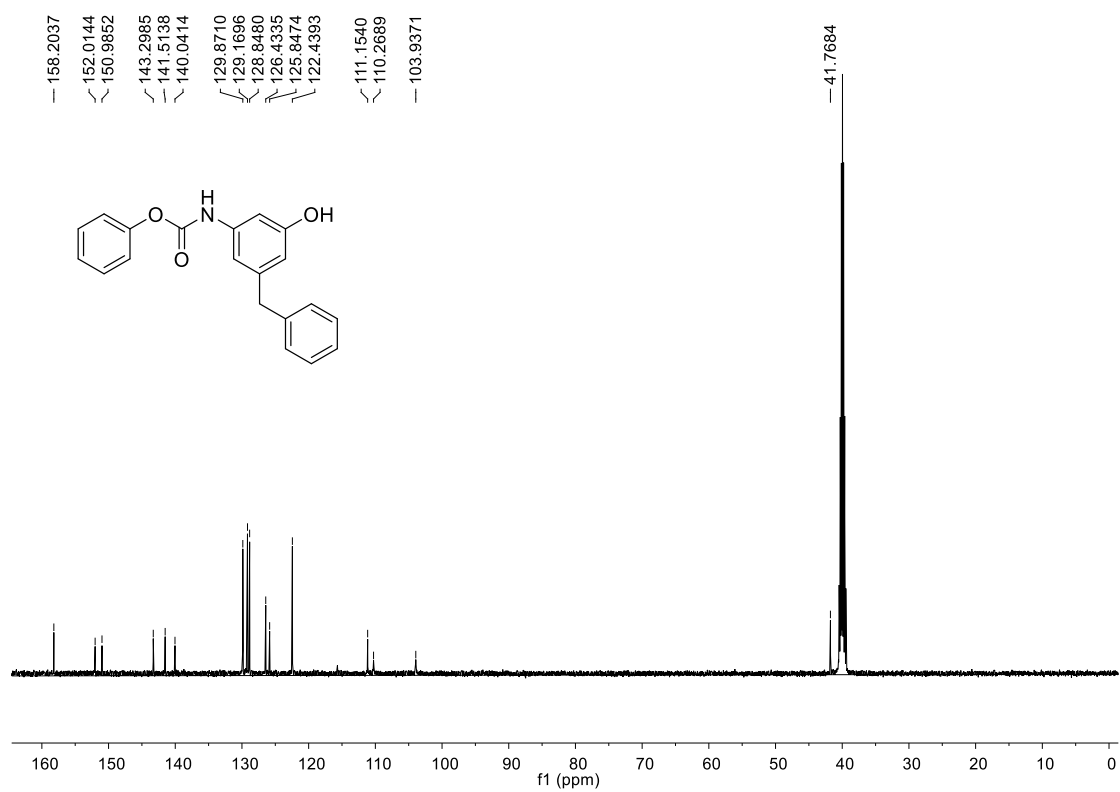

Compound 3b

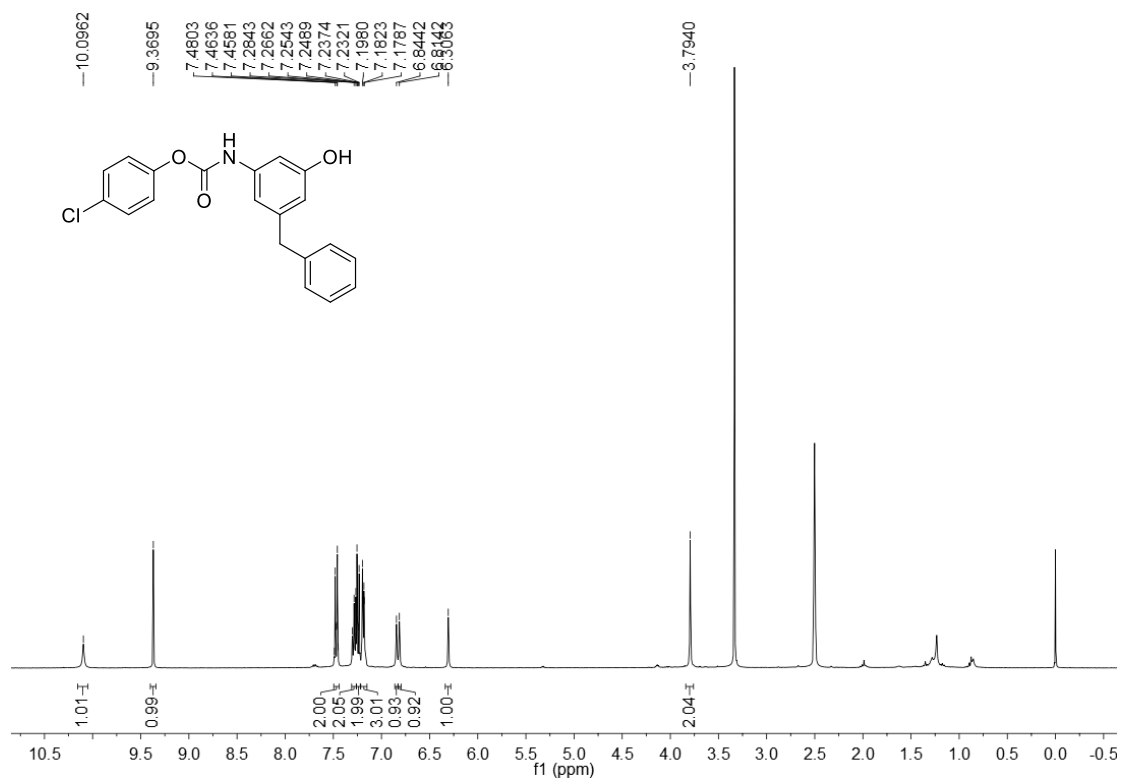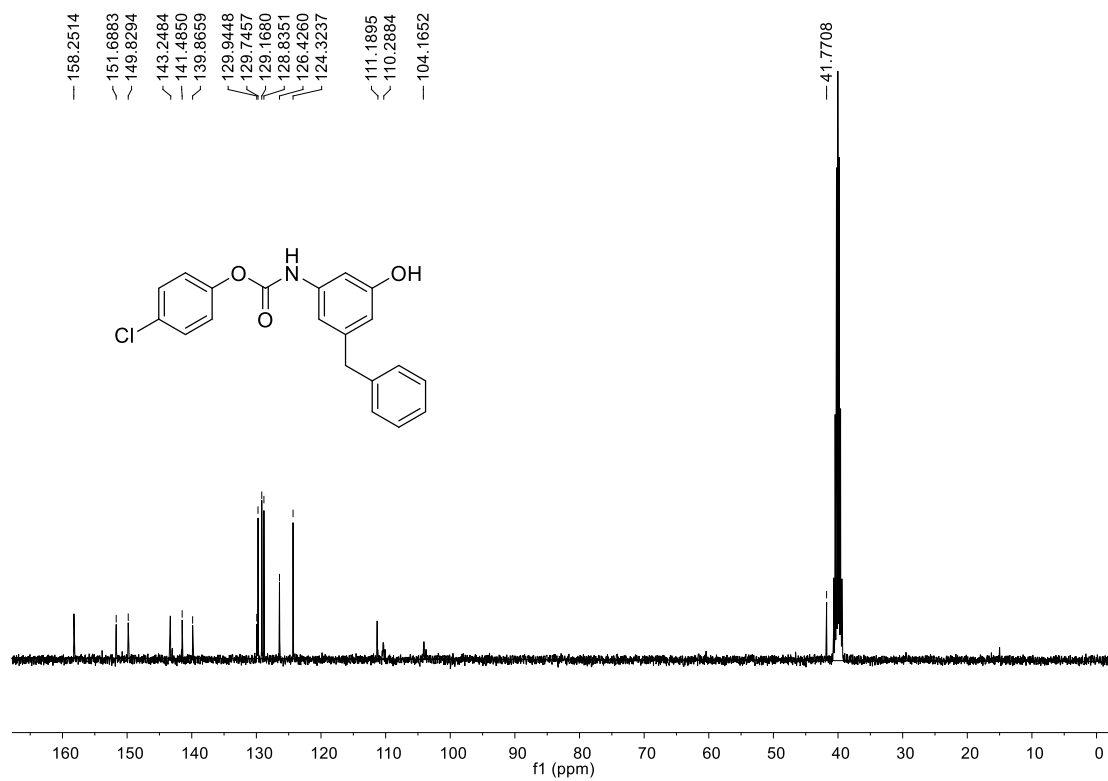

Compound 3c

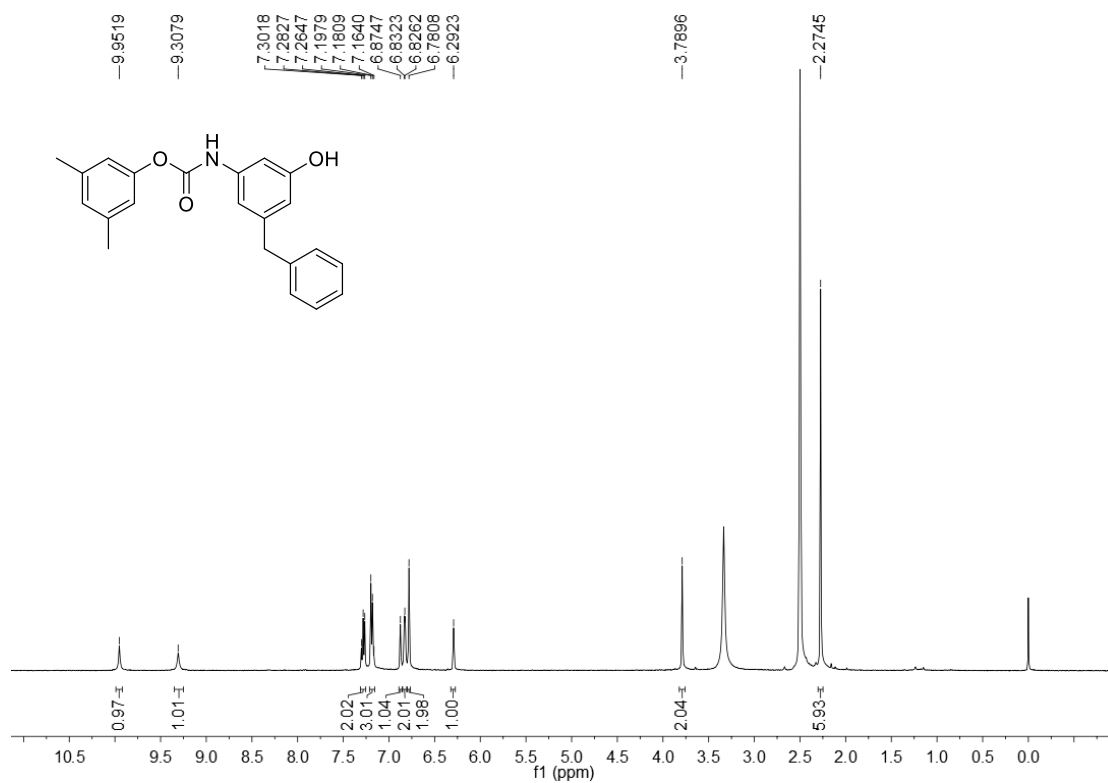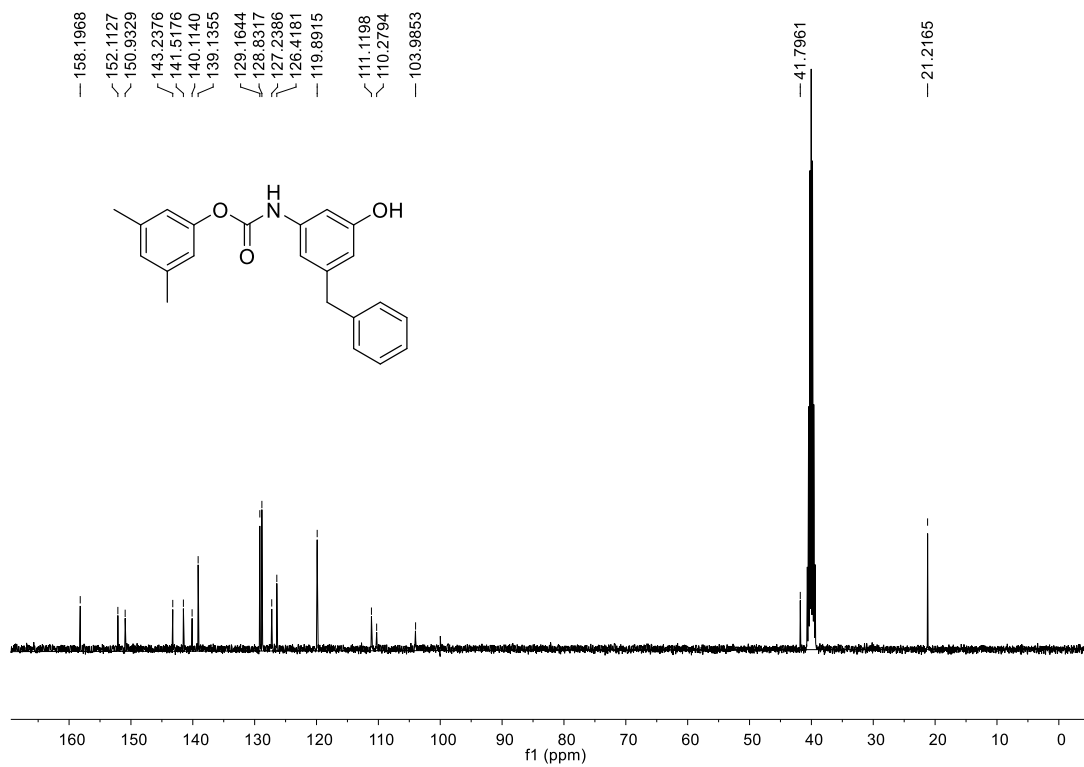



Compound 3d

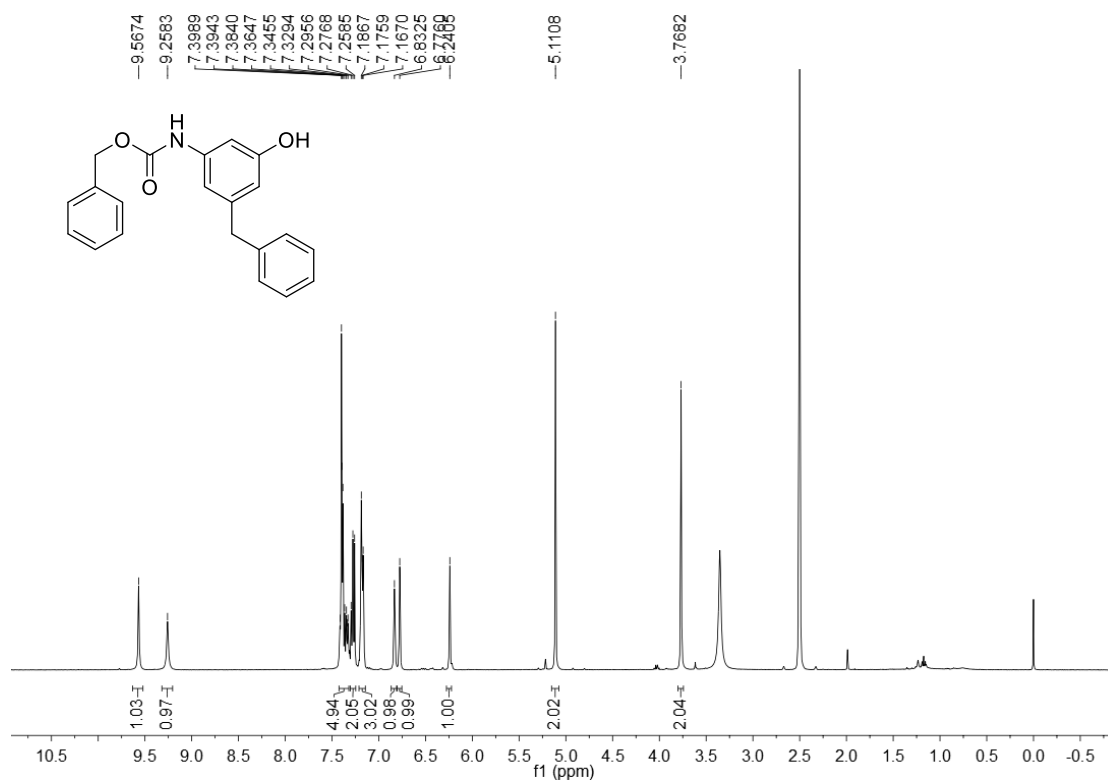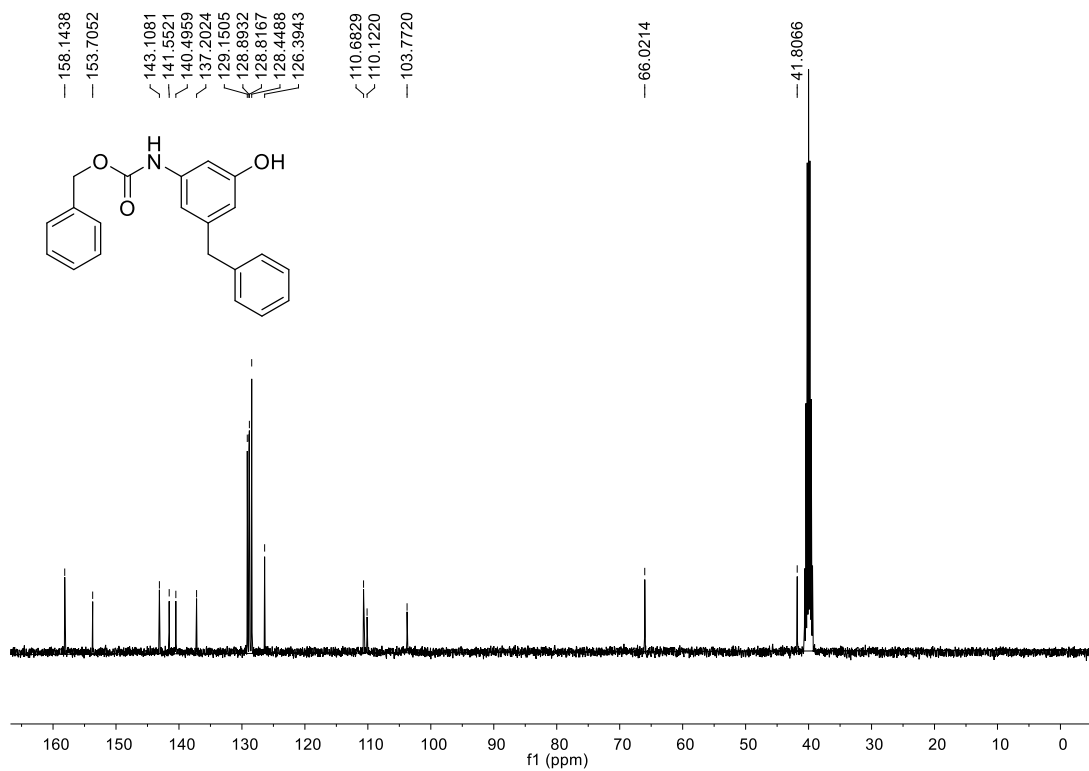

Compound 3e

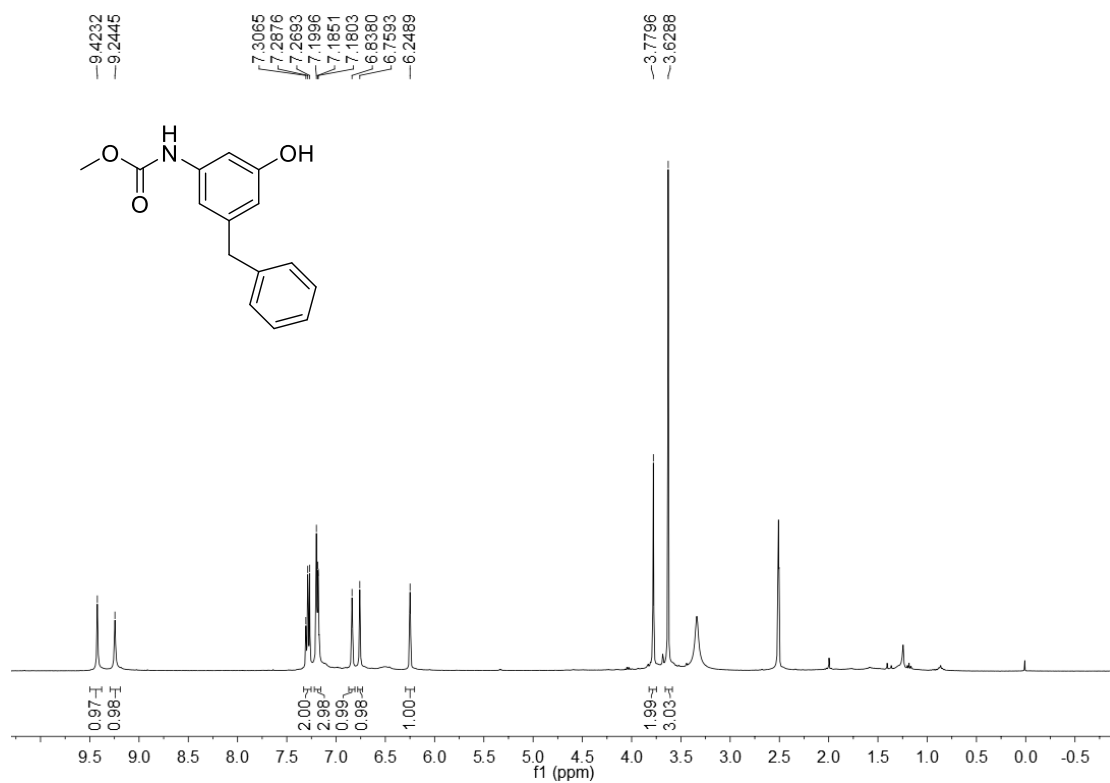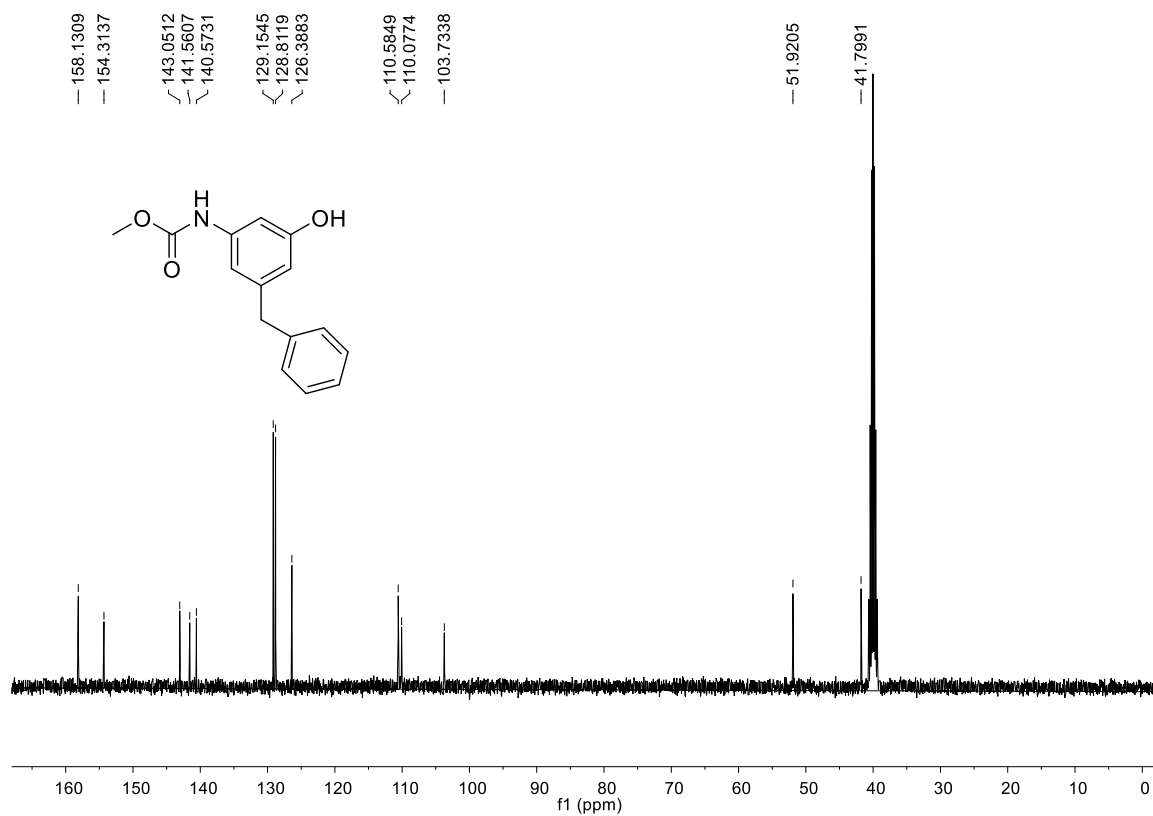

Compound **3f**

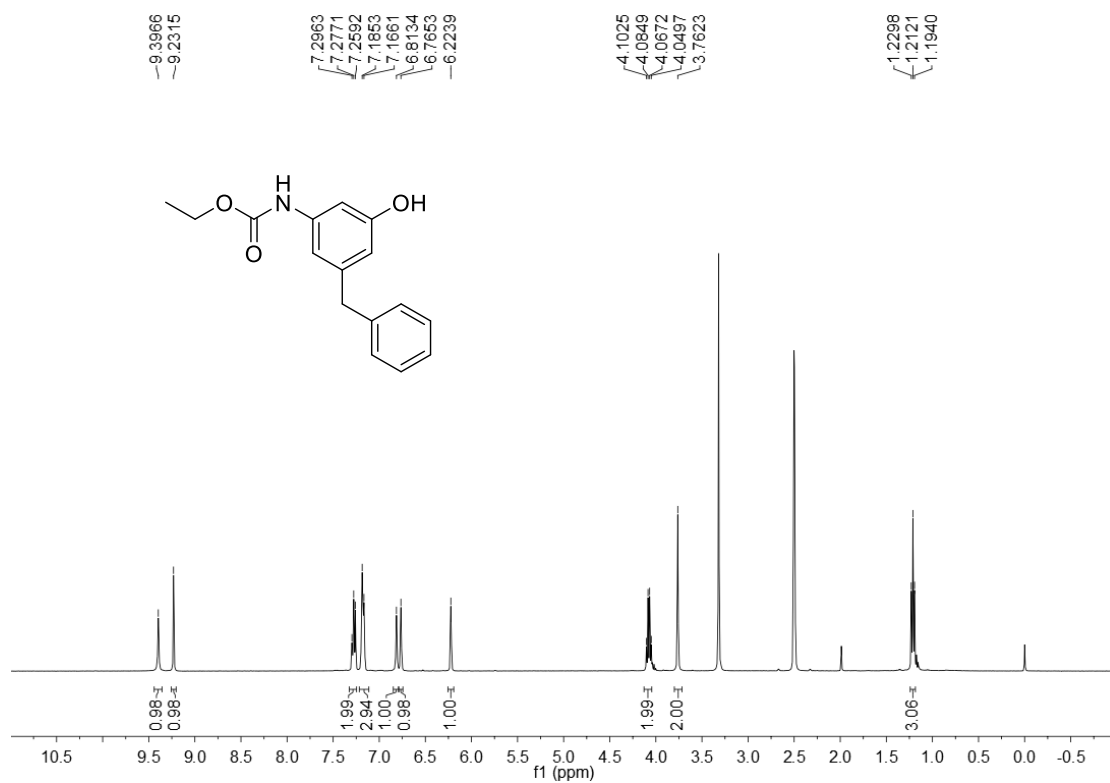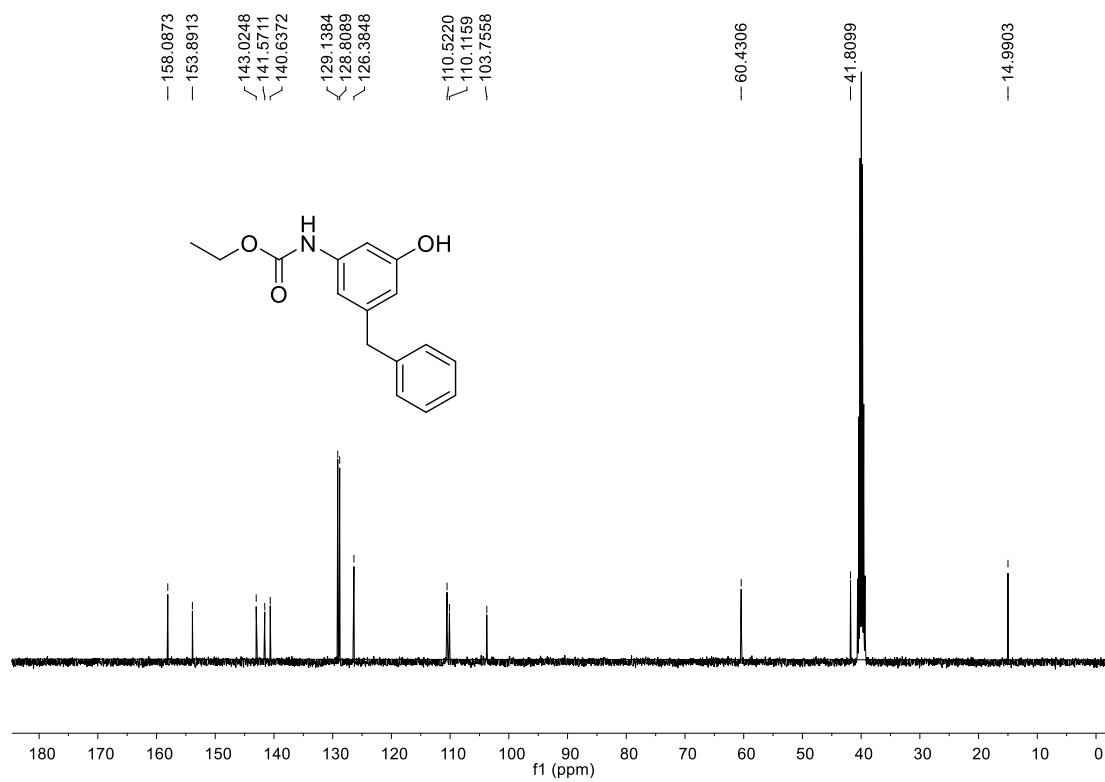

Compound **3g**

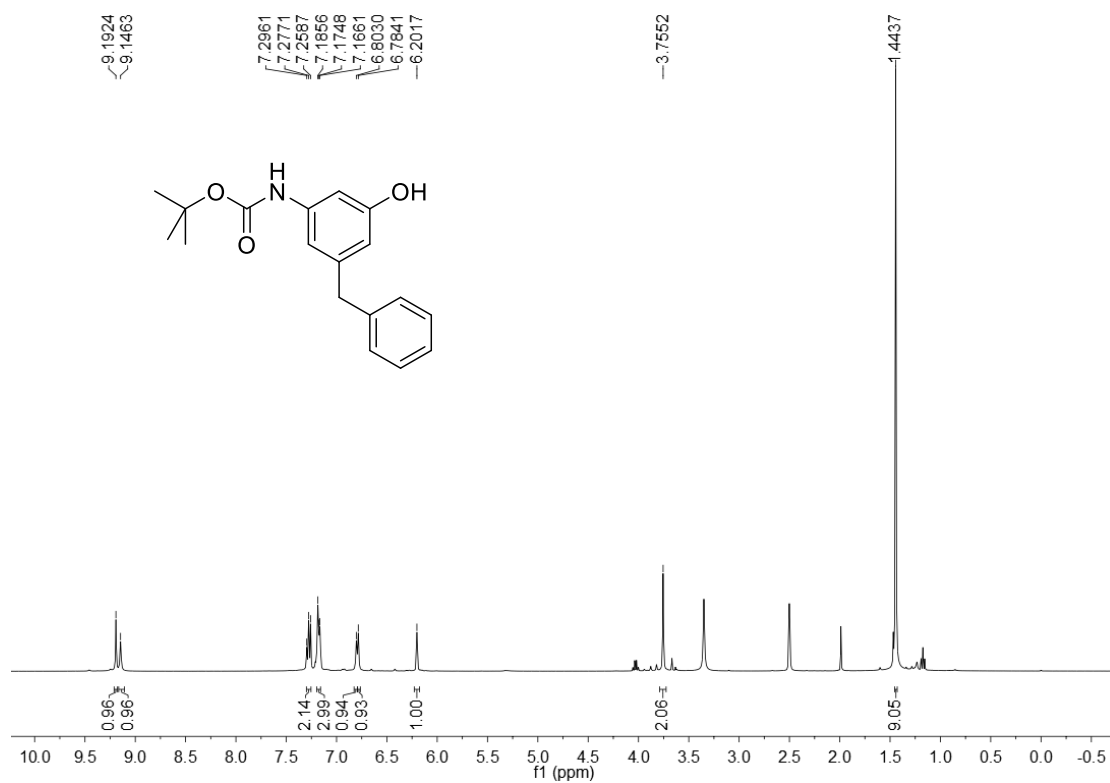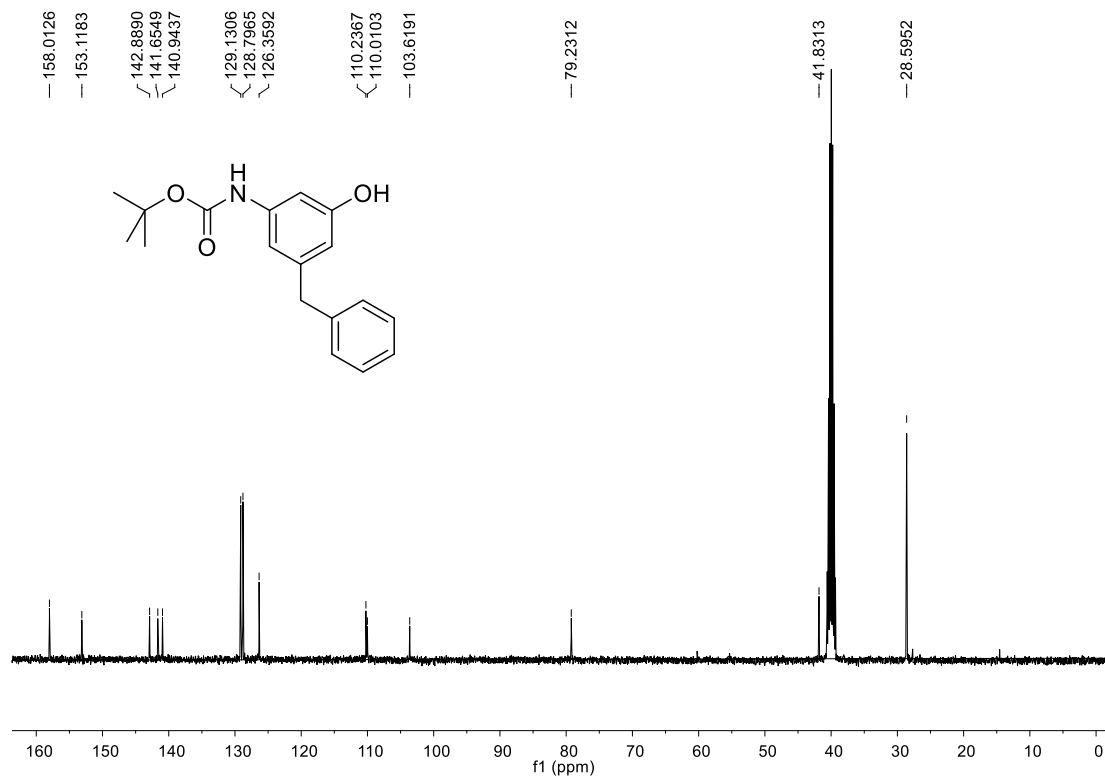

Compound **3h**

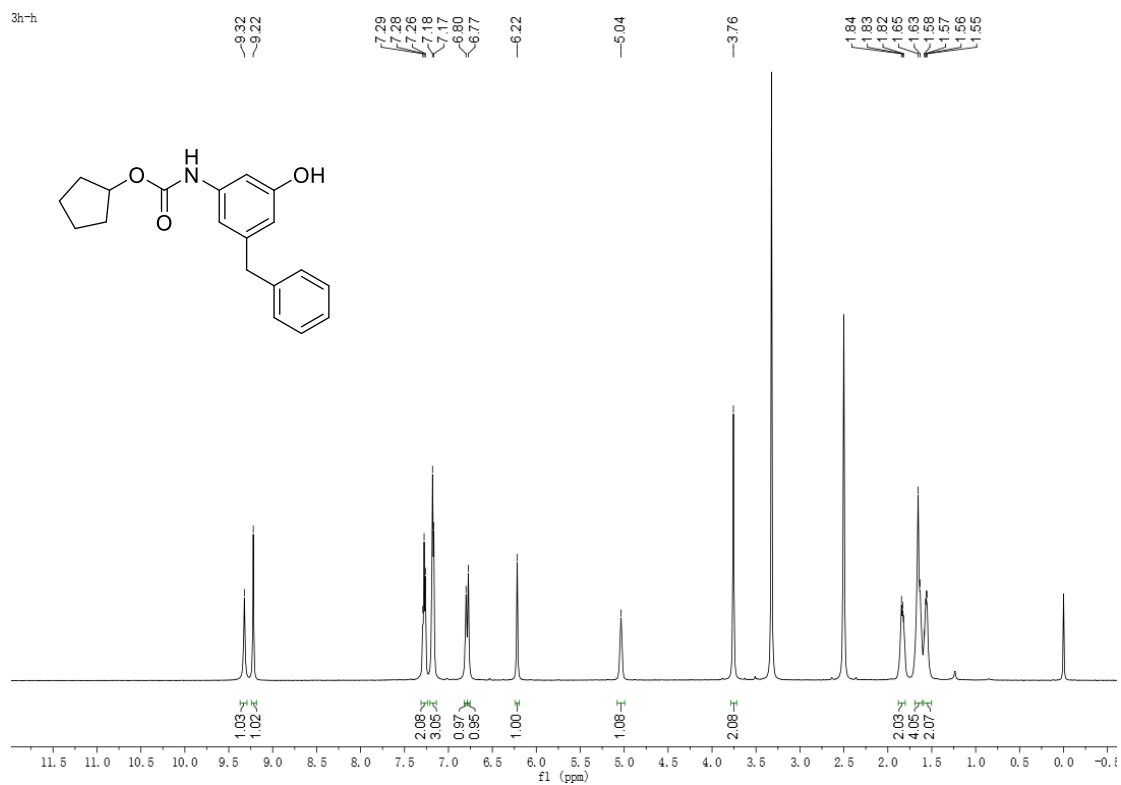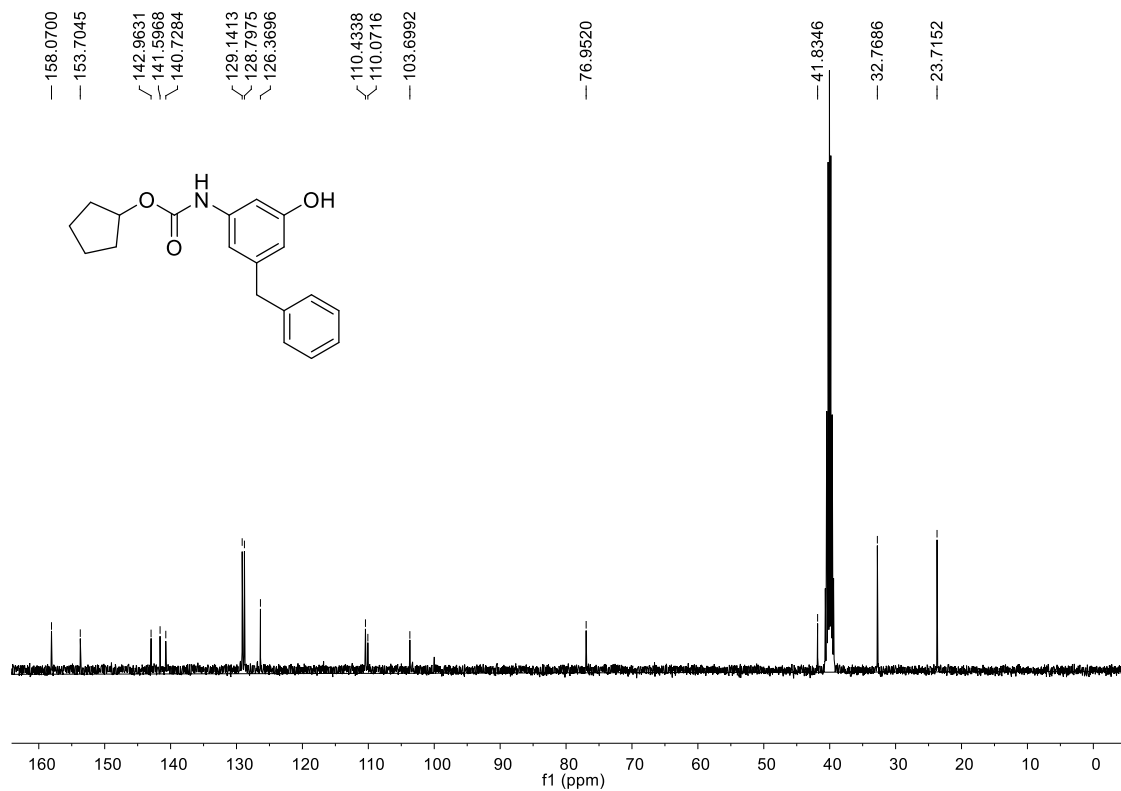

Compound 3i

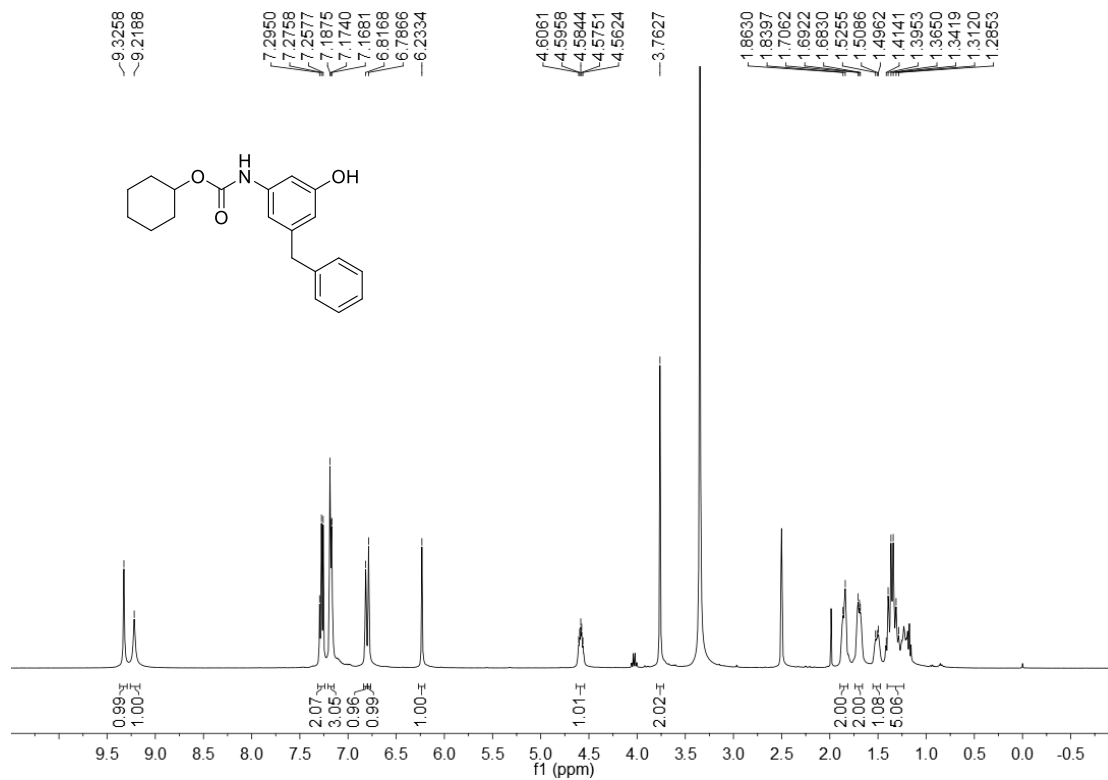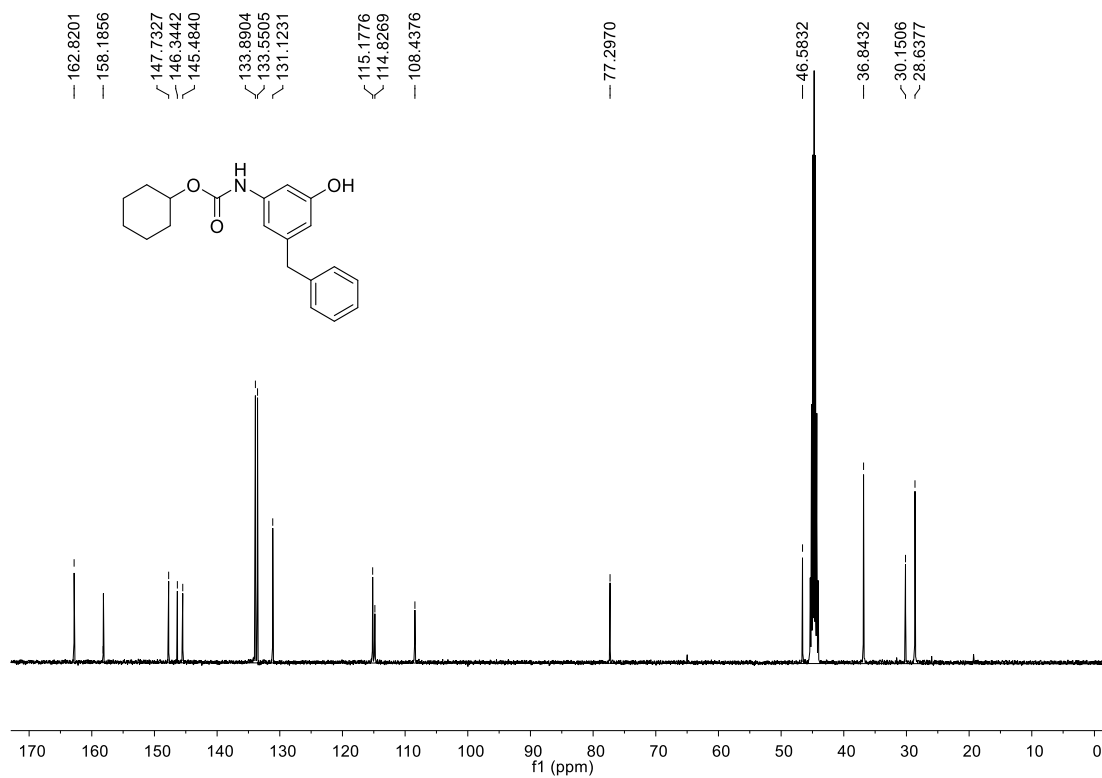

Compound 3j

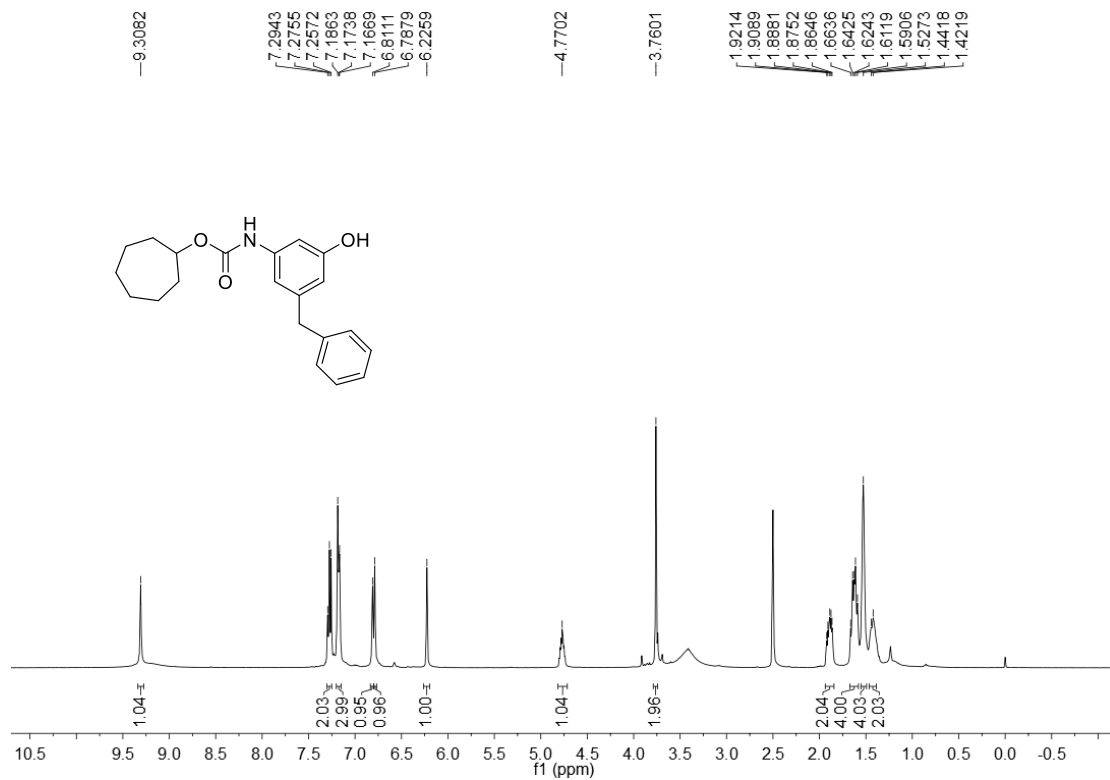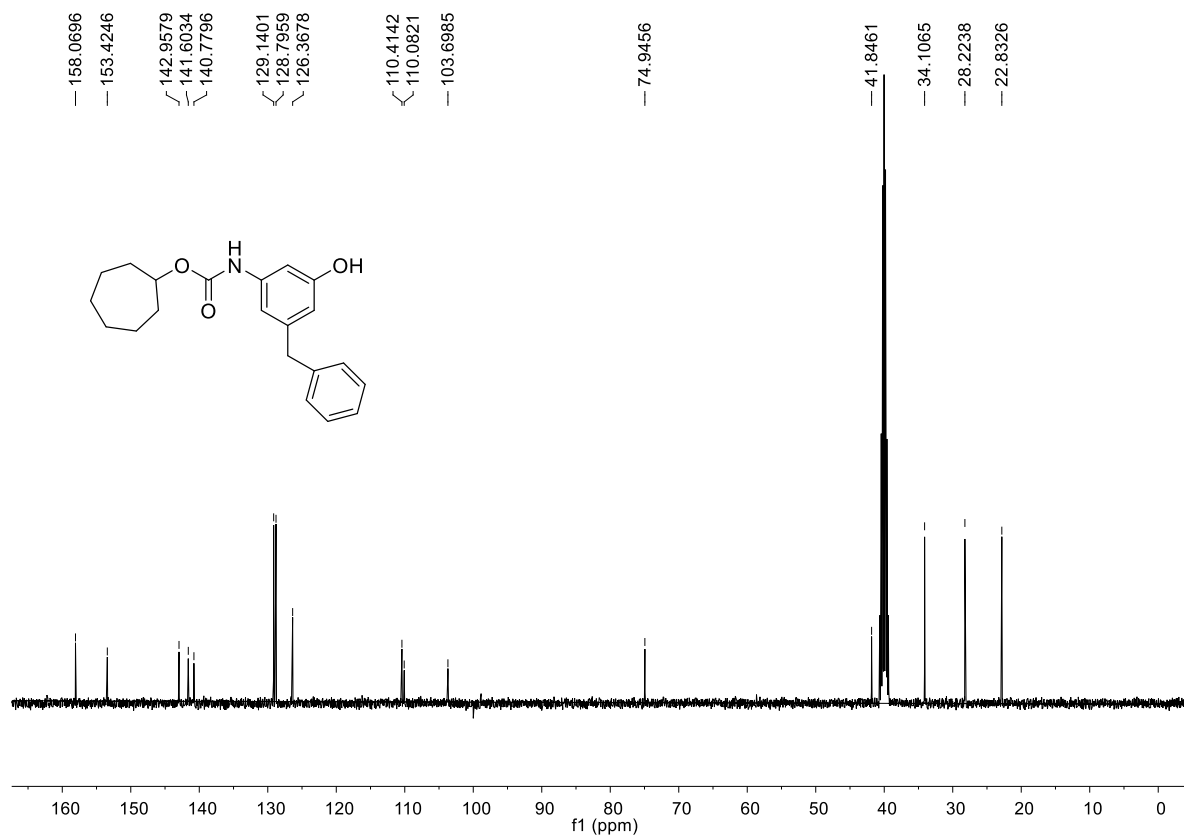

Compound 3k

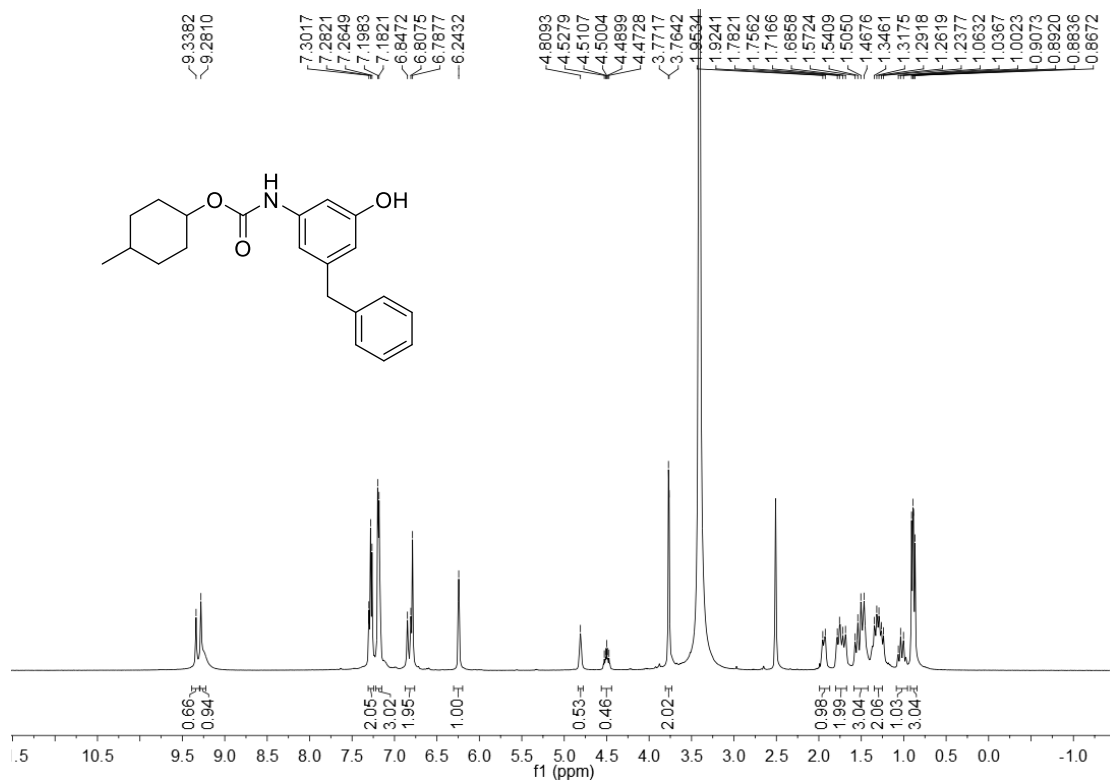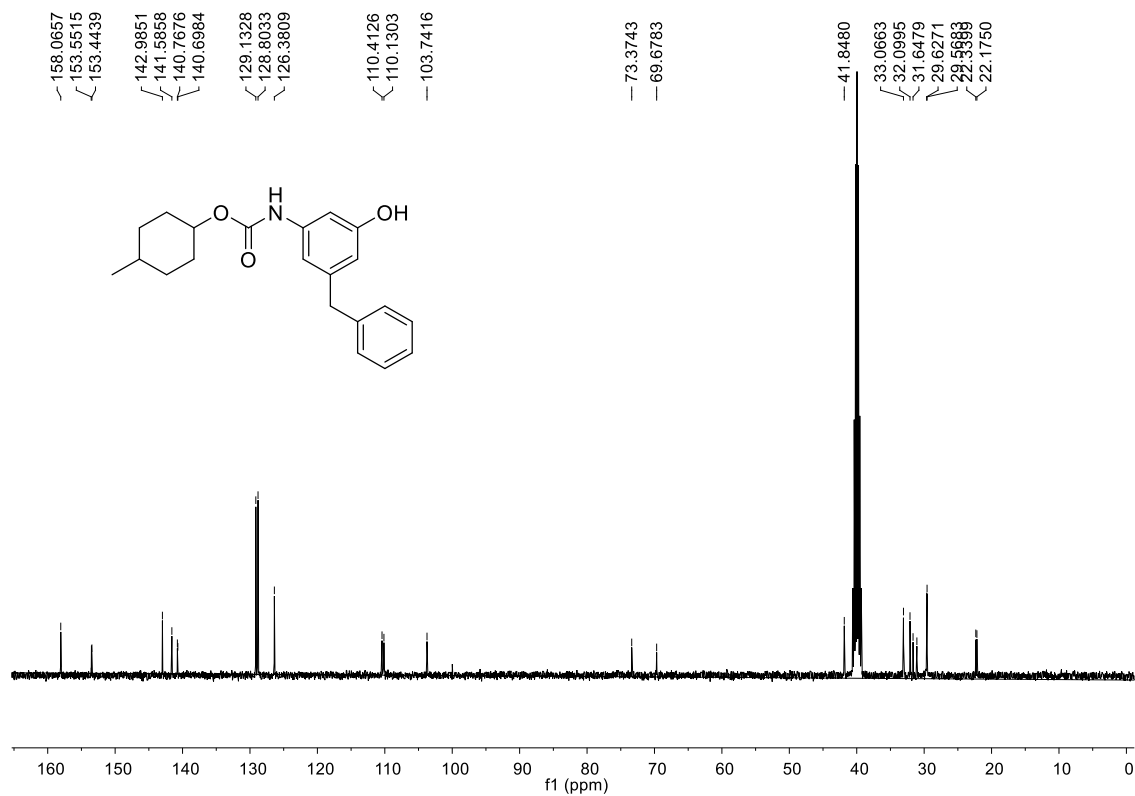



Compound 3I

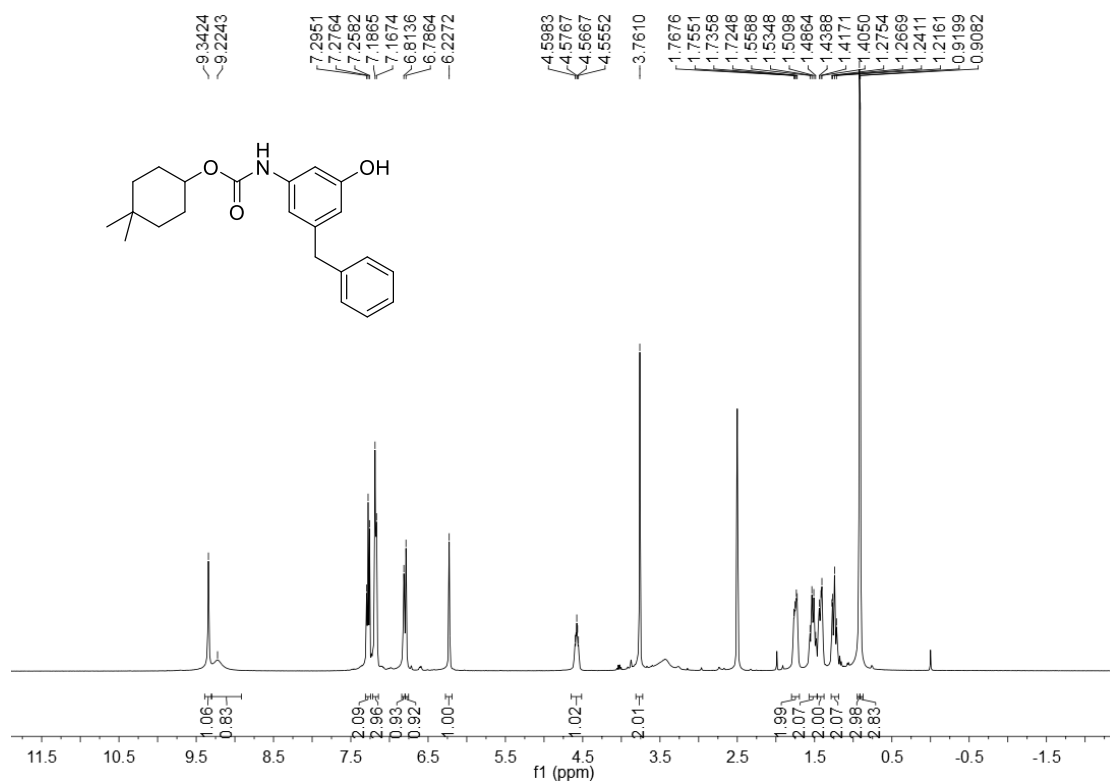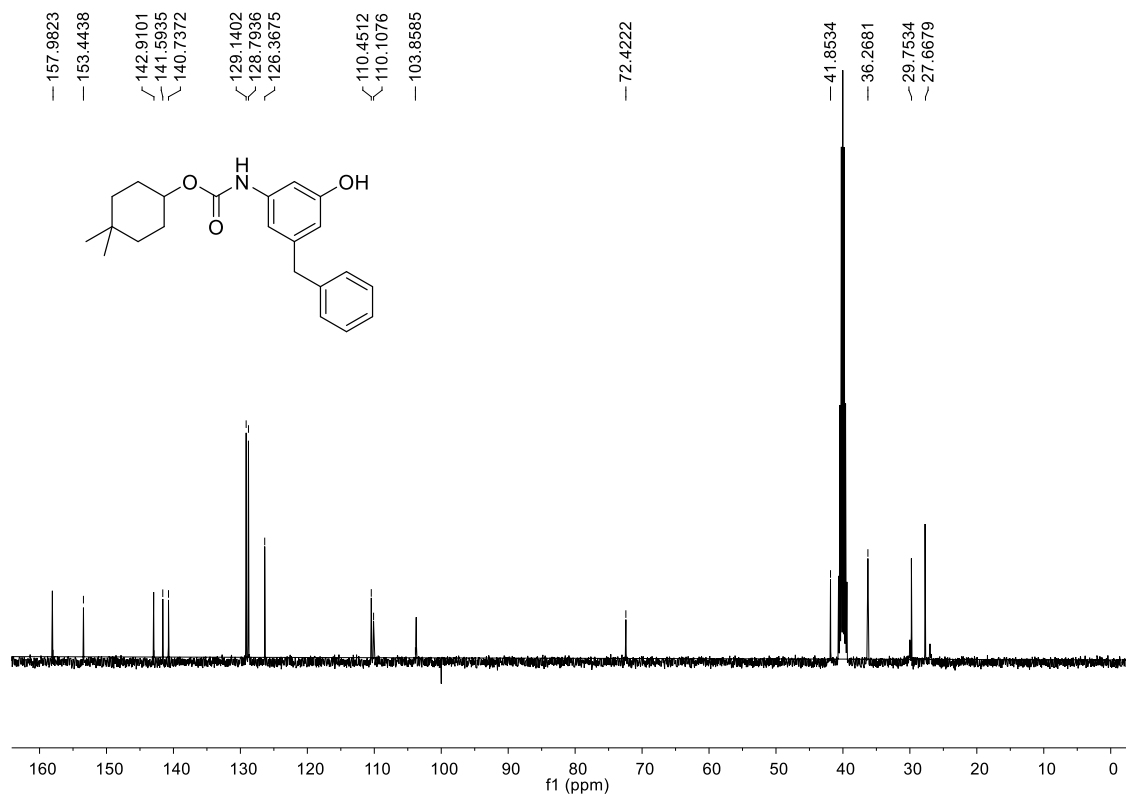

Compound 3m

M74

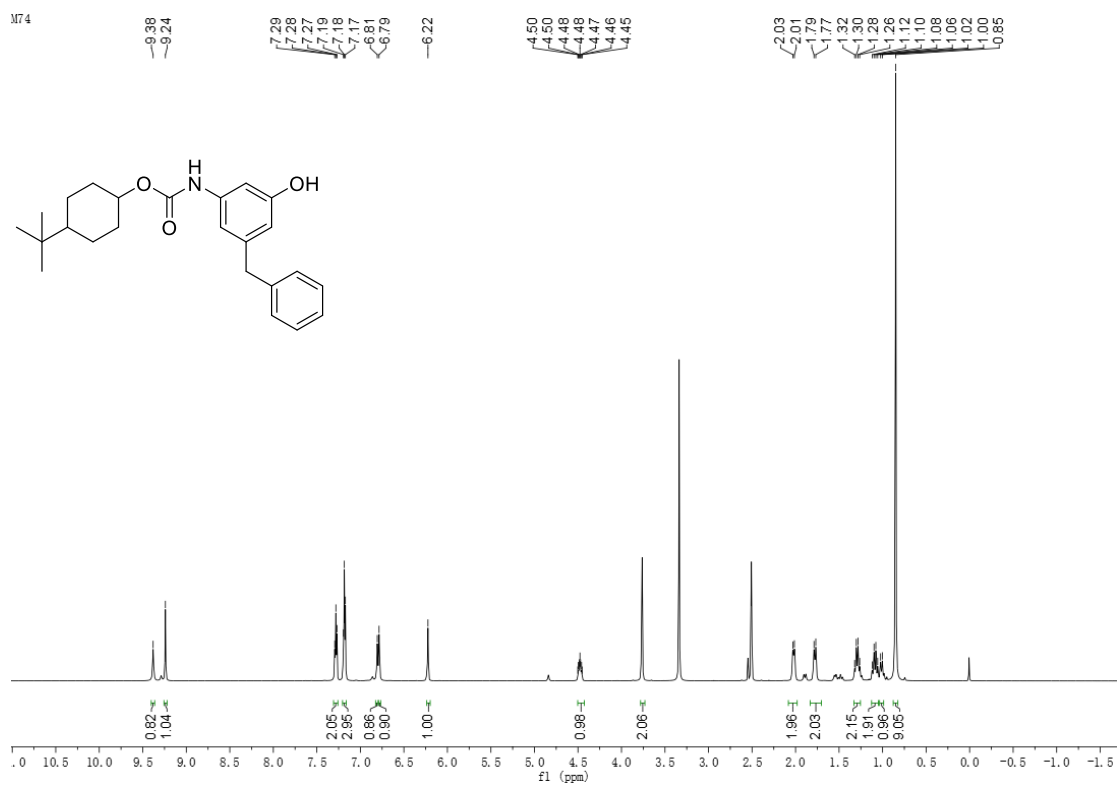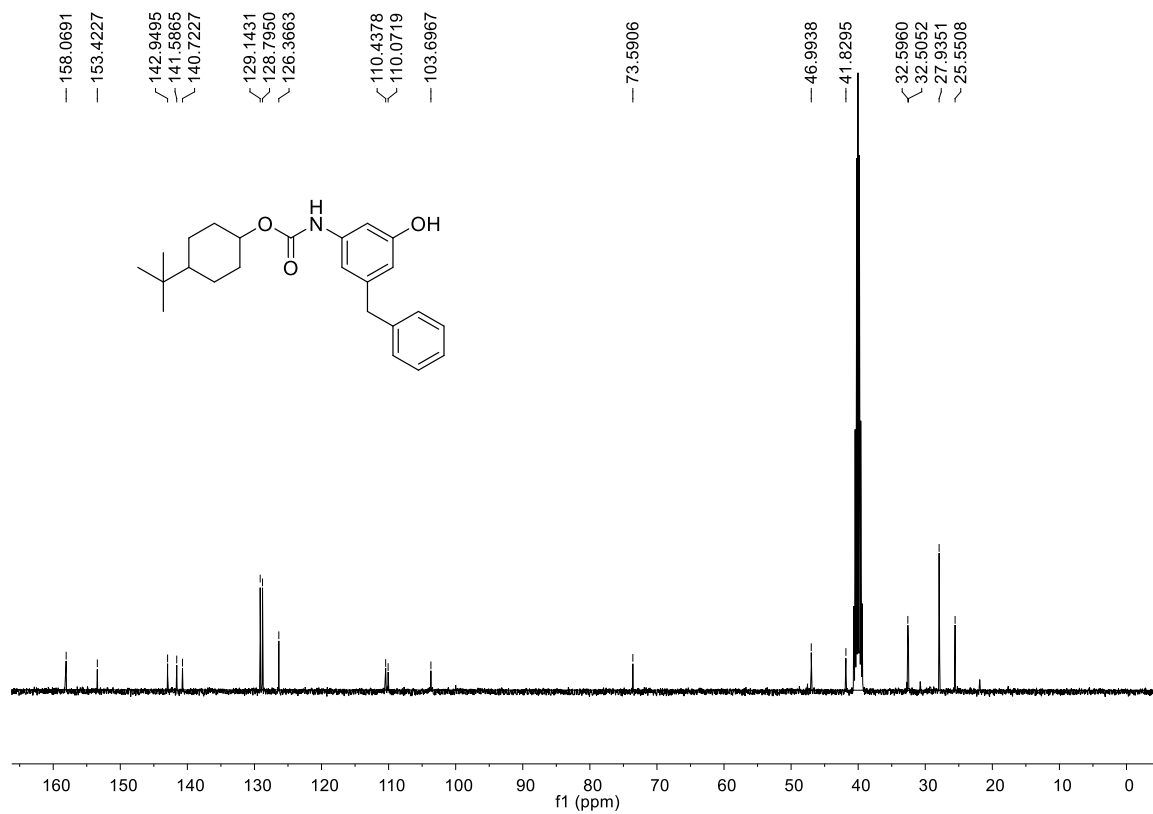

Compound 3n

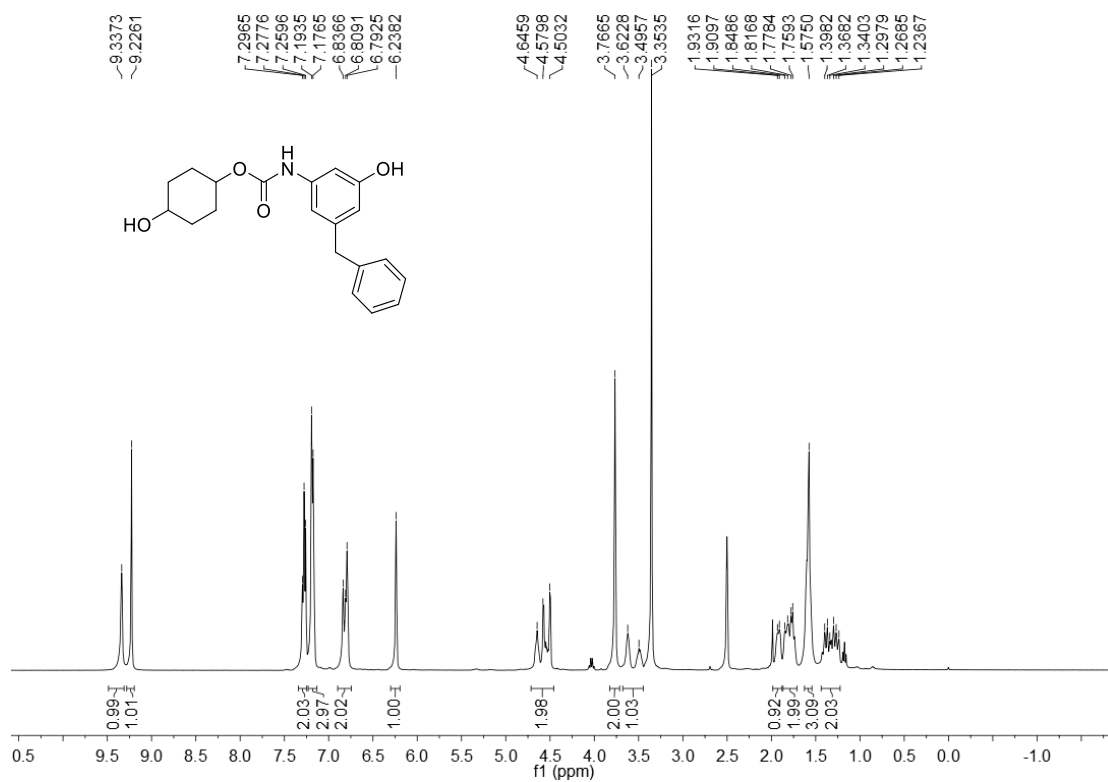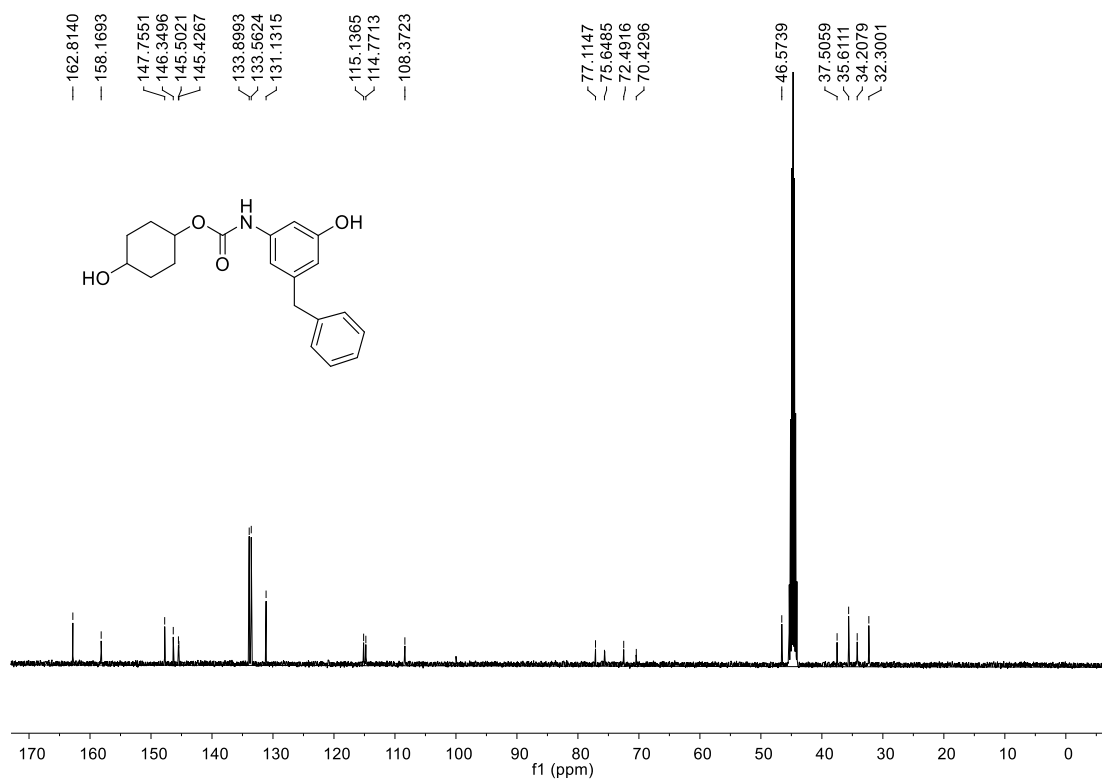

Compound 3o

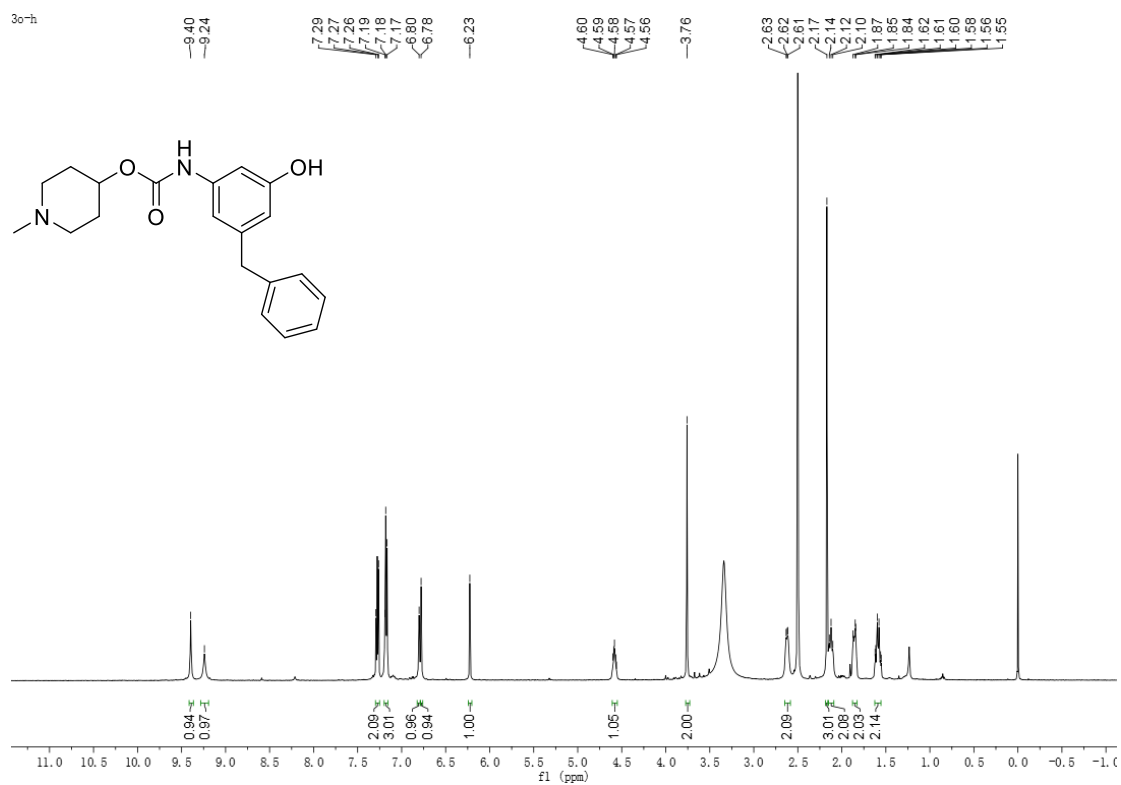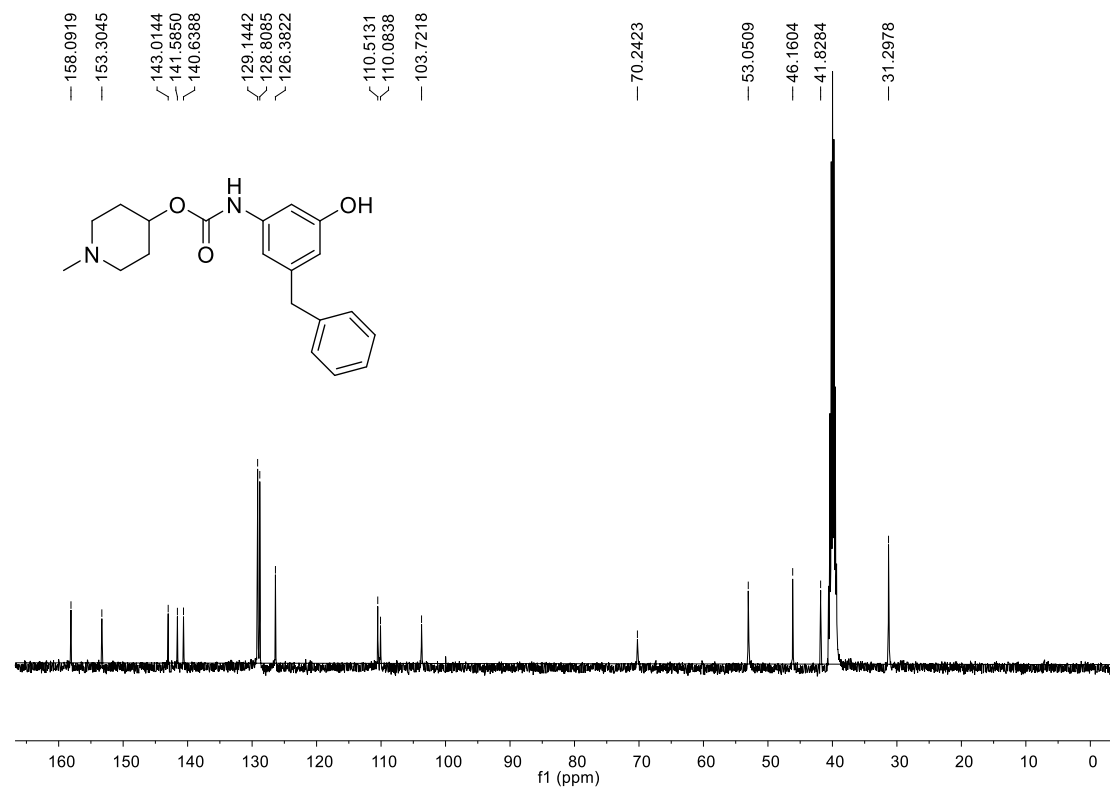

Compound 3p

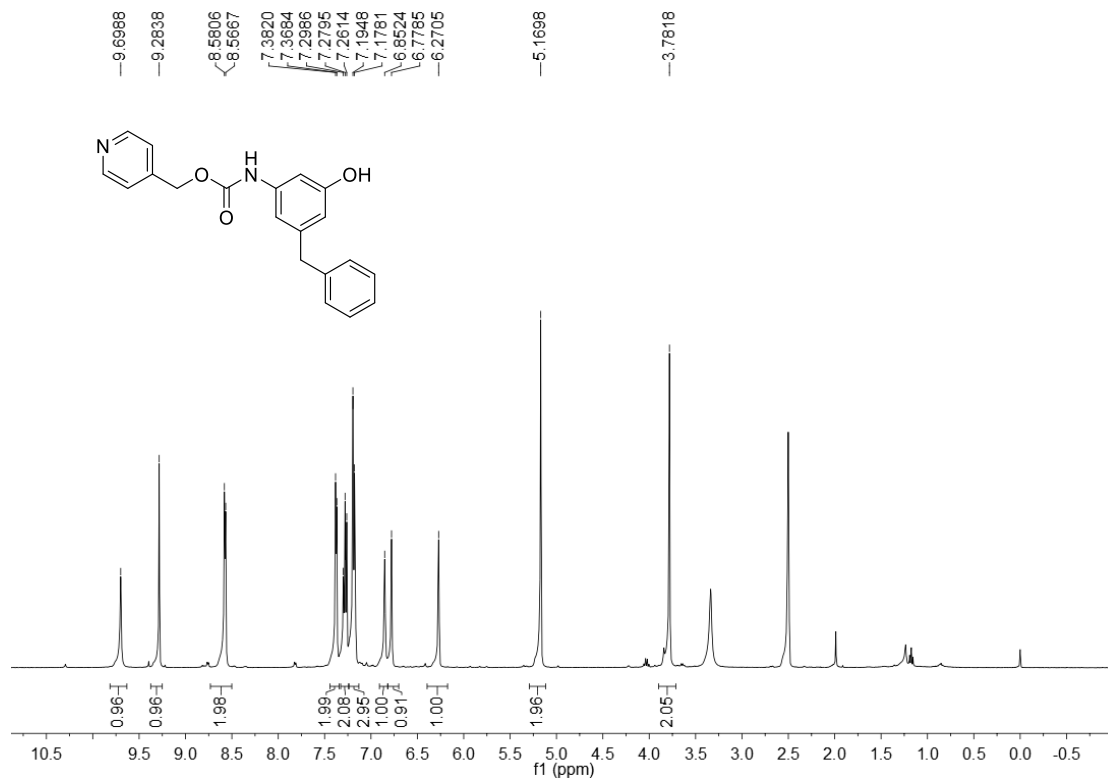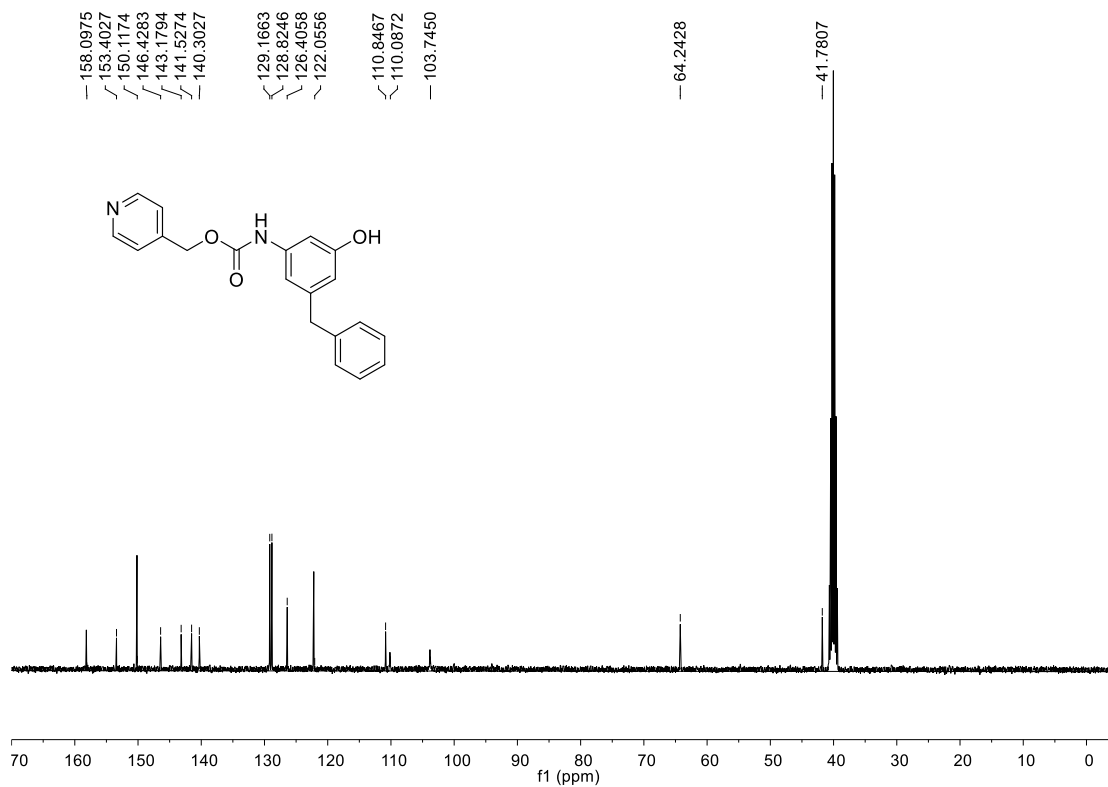

Compound 3q

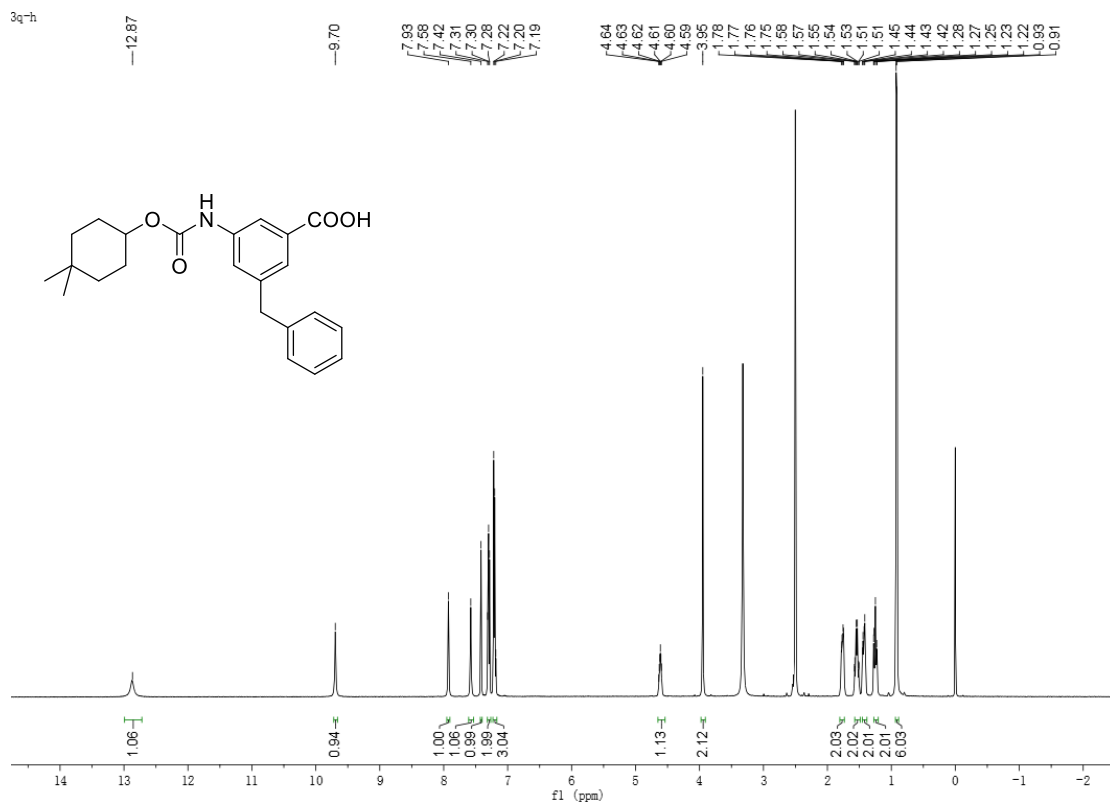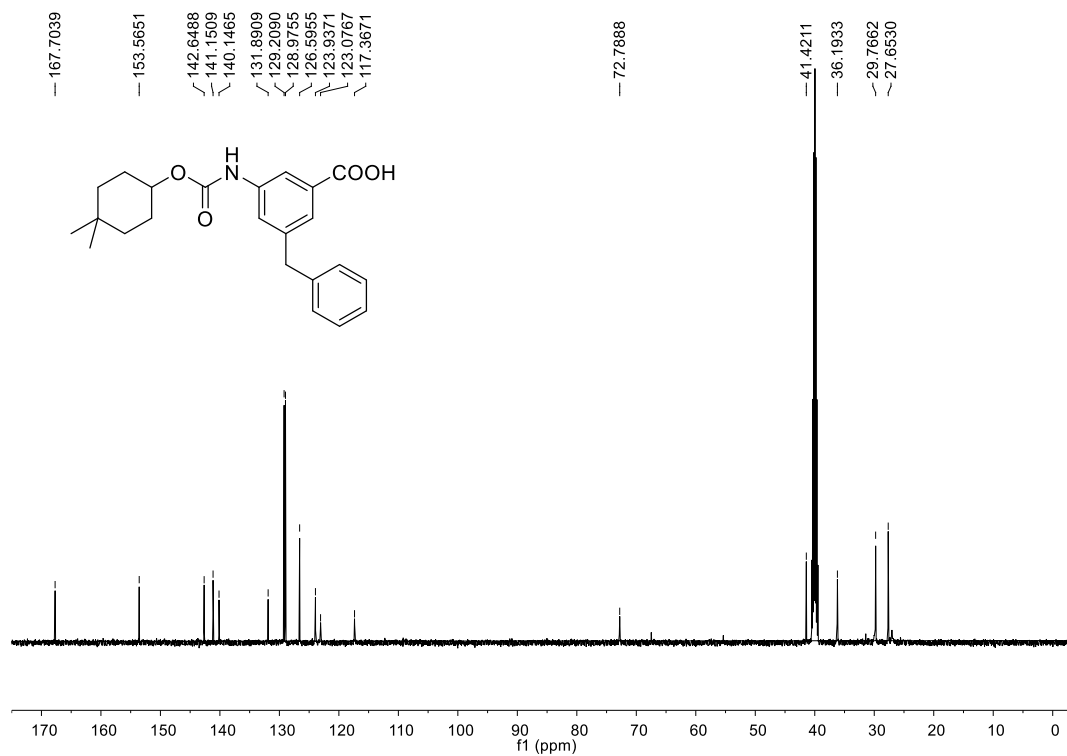

Compound 3r

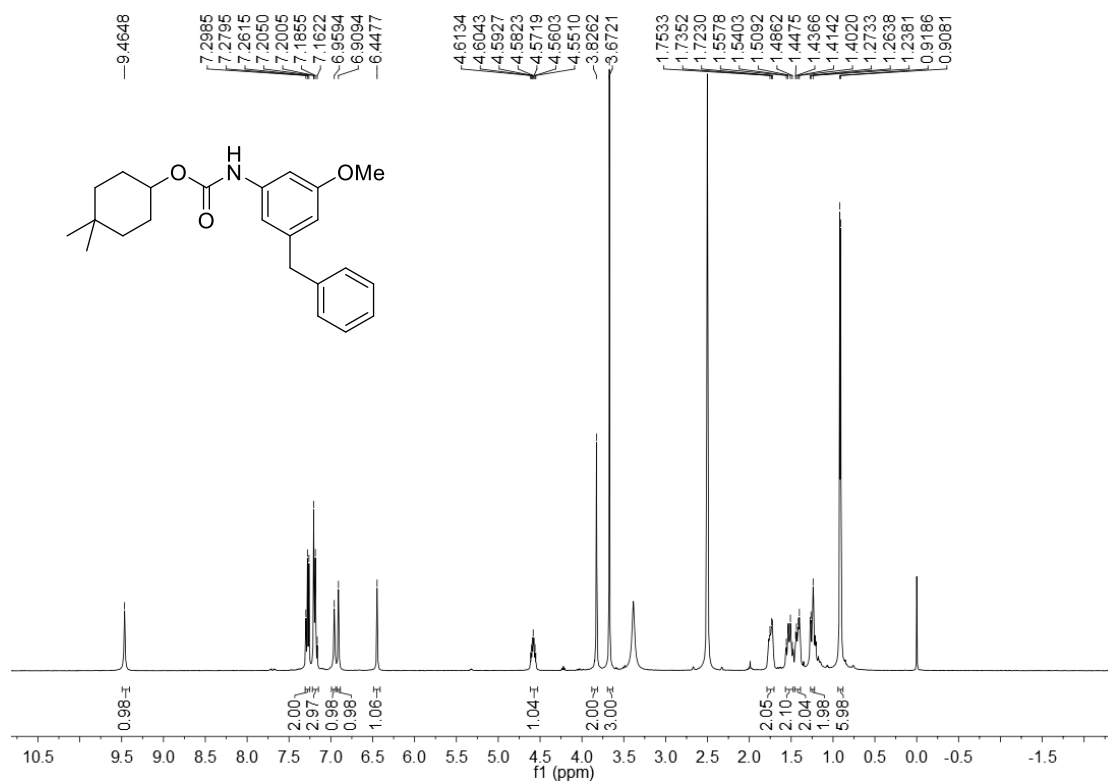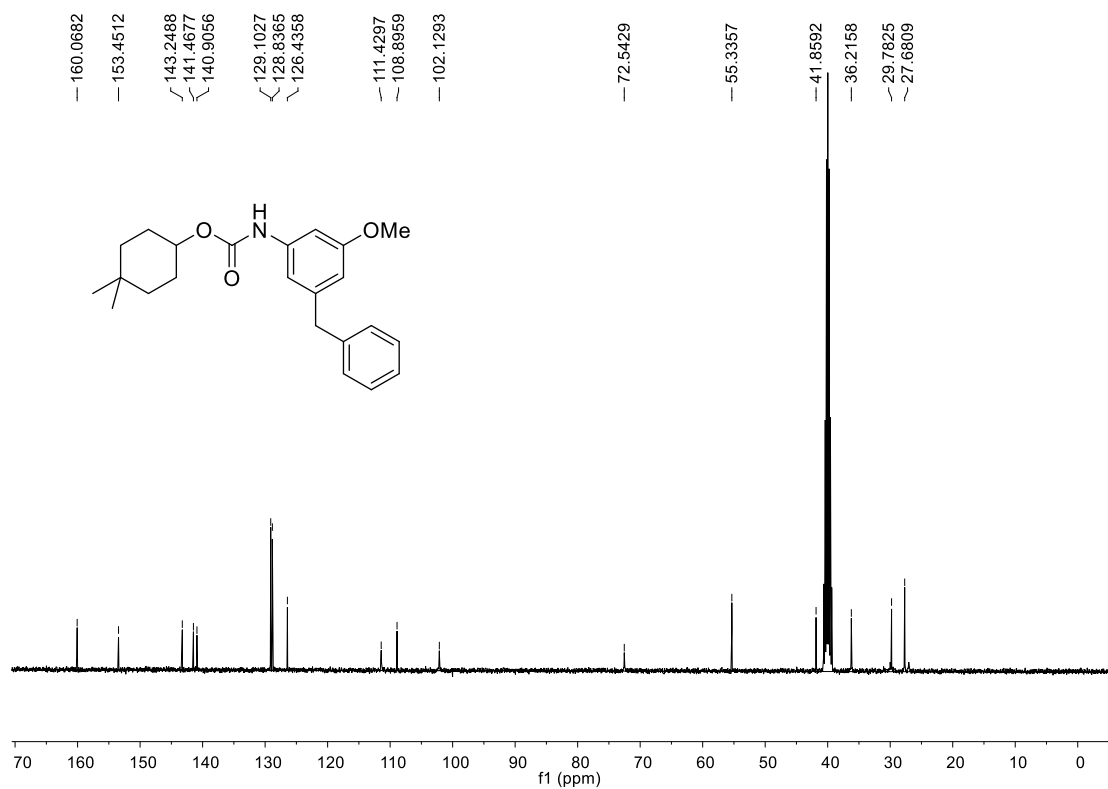

Supplement: molecules-24-02021-s001.pdf [file molecules-24-02021-s001.pdf]
